1 **Studying the dawn of *de novo* gene emergence in mice reveals fast integration**  
2 **of new genes into functional networks**

3

4

5

6

7 Chen Xie<sup>1</sup>, Cemalettin Bekpen<sup>1</sup>, Sven Künzel<sup>1</sup>, Maryam Keshavarz<sup>1</sup>, Rebecca Krebs-Wheaton<sup>1</sup>, Neva  
8 Skrabar<sup>1</sup>, Kristian Ullrich<sup>1</sup>, Diethard Tautz<sup>1\*</sup>

9

10 <sup>1</sup>Department Evolutionary Genetics, Max Planck Institute for Evolutionary Biology, August-Thienemann-  
11 Str. 2, 24306, Plön, Germany

12

13 \*Correspondence: [tautz@evolbio.mpg.de](mailto:tautz@evolbio.mpg.de)

14

15

16 Impact statement: New protein-coding genes emerging out of non-coding sequences can become directly  
17 functional without signatures of adaptive protein changes

18

19

20 **Abstract** (limited to 150 words)

21 The *de novo* emergence of new transcripts has been well documented through genomic analyses.  
22 However, a functional analysis, especially of very young protein-coding genes, is still largely lacking.  
23 Here we focus on three loci that have evolved from previously intergenic sequences in the house mouse  
24 (*Mus musculus*) and are not present in its closest relatives. We have obtained knockouts and analyzed  
25 their phenotypes, including a deep transcriptomic analysis, based on a dedicated power analysis. We show  
26 that the transcriptional networks are significantly disturbed in the knockouts and that all three genes have  
27 effects on phenotypes that are related to their expression patterns. This includes behavioral effects,  
28 skeletal differences and the regulation of the reproduction cycle in females. Substitution analysis suggests  
29 that all three genes have directly obtained an activity, without new adaptive substitutions. Our findings  
30 support the hypothesis that *de novo* genes can quickly adopt functions without extensive adaptation.

31

32

### 33 **Introduction**

34 The evolution of new genes through duplication-divergence processes is well understood (Chen, Krinsky,  
35 & Long, 2013; Kaessmann, 2010; Long, Vankuren, Chen, & Vibranovski, 2013; Tautz & Domazet-Lozo,  
36 2011). But the evolution of new genes from non-coding DNA has long been only little considered (Tautz,  
37 2014). However, with the increasing availability of comparative genome data from closely related species,  
38 more and more cases of unequivocal *de novo* transcript emergence have been described (McLysaght &  
39 Hurst, 2016; Schloetterer, 2015; Tautz, 2014; Tautz & Domazet-Lozo, 2011). These analyses have shown  
40 that *de novo* transcript origination is a very active process in virtually all evolutionary lineages. A  
41 comparative analysis of closely related mouse species has even suggested that virtually the whole genome  
42 is "scanned" by transcript emergence and loss within about 10 million years of evolutionary history  
43 (Neme & Tautz, 2016).

44

45 But unlike the detection of the transcriptional and translational expression of *de novo* genes, functional  
46 studies of such genes have lacked behind. In yeast, the *de novo* evolved gene *BSC4* was found to be  
47 involved in DNA repair (Cai, Zhao, Jiang, & Wang, 2008) and *MDF1* (D. Li et al., 2010; D. Li, Yan, Lu,  
48 Jiang, & Wang, 2014) was found to suppress mating and promote fermentation. Knockdown of  
49 candidates of *de novo* genes in *Drosophila* have suggested effects on viability and fertility (Chen, Zhang,  
50 & Long, 2010; Reinhardt et al., 2013). However, in each of these cases, the genes were already relatively  
51 old, especially when taking the short generation times of these organisms into account. The most details  
52 for a very recent *de novo* evolved gene are so far available for *Pldi* in mice, which emerged 2.5-3.5  
53 million years ago. In this case the knockout was shown to affect sperm motility and testis weight. But  
54 *Pldi* codes for a long non-coding RNA, not for a protein (Heinen, Staubach, Haming, & Tautz, 2009).  
55 Here, we focus on protein coding genes that have emerged less than 1.5 million years ago in the lineage  
56 towards the house mouse (*Mus musculus*).

57

58 There is abundant transcription of non-coding regions in vertebrate genomes (Consortium, 2012;  
59 Consortium et al., 2007; Neme & Tautz, 2016). Hence, the raw material for new genes is present at any  
60 time and most of these transcripts have at least short open reading frames (ORFs). Analysis of ribosome  
61 profiling data has shown that these are often translated (Ruiz-Orera, Messeguer, Subirana, & Alba, 2014;  
62 Ruiz-Orera, Verdaguier-Grau, Villanueva-Canas, Messeguer, & Alba, 2018), implying that many peptides  
63 derived from essentially random sequences can continuously be "tested" by evolution. If such a peptide  
64 conveys even a small evolutionary advantage, it is expected to come initially under stabilizing selection  
65 and eventually also under positive selection after acquiring further mutations. If it conveys a disadvantage,  
66 it should come under negative selection and should quickly be lost. In case it is evolutionary neutral, *i.e.*,  
67 has no effect on the phenotype, it could still stay in the gene pool for some time, until a random disabling  
68 mutation occurs and becomes fixed in the population. Hence, for the youngest genes it is particularly  
69 important to show that they have effects on phenotypes, *i.e.*, they are not simply neutral bystanders.

70  
71 Expression of random peptides in *E. coli* has shown that the majority is indeed not neutral, but conveys a  
72 growth disadvantage or advantage to the cells (Neme, Amador, Yildirim, McConnell, & Tautz, 2017).  
73 However, the conclusion of whether such peptides can convey indeed a direct advantage has been  
74 challenged (Knopp & Andersson, 2018; Tautz & Neme, 2018). Hence, it is of major interest to ask for  
75 very recently evolved protein-coding transcripts, whether these have already become integrated into  
76 regulatory networks and whether they have effects on phenotypes. It is important to study them at the  
77 "dawn" of gene emergence, *i.e.*, to capture them before further adaptation has taken place.

78  
79 Using mouse as a model system for studying *de novo* gene evolution has the advantage that organ-specific,  
80 morphological and behavioral effects can be studied. The latter is of special relevance, since a large  
81 fraction of the *de novo* genes are initially expressed in the brain, possibly because they are somewhat  
82 shielded from the adaptive immune system (Bekpen, Xie, & Tautz, 2018). Further, a large diversity of

83 recently differentiated populations and subspecies is available for mice, allowing to trace even very recent  
84 evolutionary events.

85

86 Here, we have generated a list of over one hundred candidate proteins that have evolved in the lineage of  
87 mice, after they split from rats. We show that most of these are translated, as inferred from ribosome  
88 profiling data, as well as mass spectrometry data. From this list, we have chosen three genes that have  
89 emerged particularly recent and subjected them to extensive molecular and phenotypic analysis. We  
90 conclude that all three of them have functions that would have been present from the time onwards at  
91 which they were born, without measurable further adaptation. These results support the notion that  
92 random peptide sequences have a good probability for conveying evolutionarily relevant functions.

93

94

## 95 **Results**

### 96 *Recently evolved de novo genes in the mouse genome*

97 To identify candidates for recently evolved *de novo* genes, we have applied a combined phylostratigraphy  
98 and synteny-based approach. Note that while the phylostratigraphy based approach was criticized to  
99 potentially include false positives (Moyers & Zhang, 2015), we have shown that the problem is relatively  
100 small and that it is in particularly not relevant for the most recently diverged lineages within which *de*  
101 *novo* gene evolution is traced (Domazet-Lošo et al., 2017). We were able to identify 119 predicted  
102 protein-coding genes from intergenic regions that occur only in the mouse genome, but not in rats or  
103 humans (Figure 1 - figure supplement 1). We re-assembled their transcriptional structures and estimated  
104 their expression levels using available ENCODE RNA-Seq data in 35 tissues (Figure 1). To validate that  
105 their predicted ORFs are indeed translated, we have searched ribosome profiling and peptide mass  
106 spectrometry datasets (Figure 1 - figure supplement 1). We found for 110 out of the 119 candidate genes  
107 direct evidence for translation.

108

109 Expression of these genes is found throughout all tissues analyzed, with notable differences. Testis and  
110 brain express the highest fraction, while the digestive system and liver express the lowest fraction (Figure  
111 1A). Expression levels of these genes are generally lower than those of other genes (FPKM medians: 0.63  
112 vs. 8.18; two-tailed Wilcoxon rank sum test, P-Value  $< 2.2 \times 10^{-16}$ ; Figure 1C). Most overall molecular  
113 patterns are similar to previous findings (Neme & Tautz, 2013; Schmitz, Ullrich, & Bornberg-Bauer,  
114 2018). They have fewer exons (medians: 2 vs. 7; two-tailed Wilcoxon rank sum test, P-Value  $< 2.2 \times 10^{-16}$ )  
115 and fewer coding exons than other genes (medians: 1 vs. 6; two-tailed Wilcoxon rank sum test, P-  
116 Value  $< 2.2 \times 10^{-16}$ ). The lengths of their proteins are shorter than those of other proteins (medians: 125  
117 vs. 397; two-tailed Wilcoxon rank sum test, P-Value  $< 2.2 \times 10^{-16}$ ). However, their proteins are predicted  
118 to be less disordered than other proteins (medians: 0.20 vs. 0.27; two-tailed Wilcoxon rank sum test, P-  
119 Value = 0.0024; Figure 1D) and equally hydrophobic to other proteins (medians: 0.56 vs. 0.57; two-tailed  
120 Wilcoxon rank sum test, P-Value = 0.52; Figure 1E). Note that the two sets of values show a broad  
121 distribution.  
122

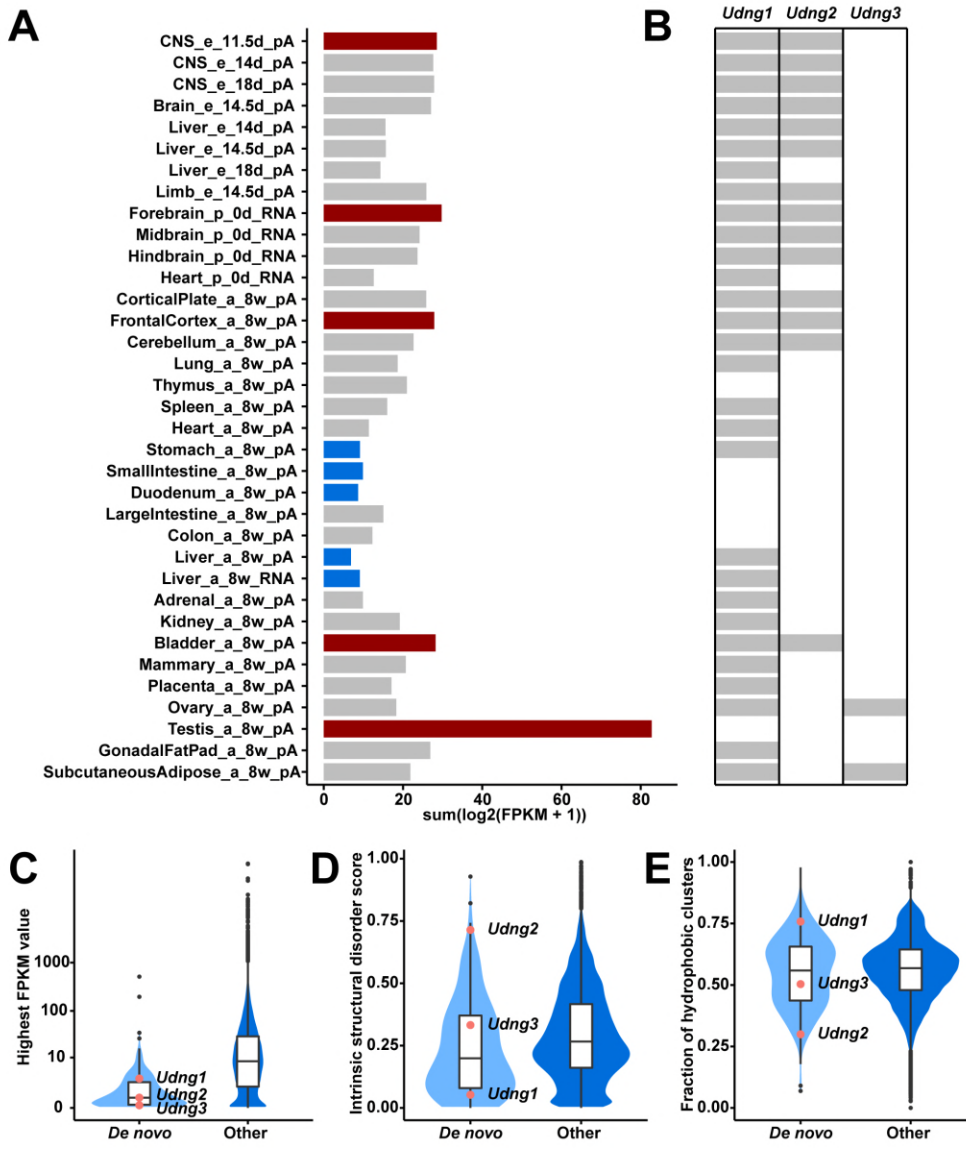

123

124

**Figure 1.** Transcriptional abundance and structural features of the 119 candidate *de novo* genes.

125

(A) Transcriptional abundance in each tissue, represented as the sum of log transformed FPKM value of

126

each transcript. Details on tissue designations and RNA samples are provided in Figure 1 - figure

127

supplement 1. The five tissues with the highest fractions are highlighted in red and the lowest ones in blue.

128

(B) Transcriptional abundance of the three genes studied here, *Udng1*, *Udng2*, and *Udng3* in each tissue.

129

FPKM values greater than or equal to 0.1 are marked as gray, lower levels or absence in white. (C)

130

Comparison of overall expression levels (represented as the highest FPKM values in the 35 tissues)

131

between *de novo* and other protein-coding genes. (D) Comparison of averages of intrinsic structural

132

disorder scores between *de novo* and other protein-coding genes. (E) Comparison of fractions of sequence

133

covered by hydrophobic clusters between *de novo* and other protein-coding genes. The corresponding

134

values for the three genes studied here (see Table 1) are indicated in the three violin plots.

135

136 *Genes for functional analyses*

137 We selected three genes from the above list for in-depth analyses, including knockouts, transcriptomic  
 138 studies and phenotyping (Table 1). For convenience we will call these genes in the following "*Unnamed*  
 139 *de novo genes - Udng*", *i.e.*, *Udng1*, *Udng2*, and *Udng3*, but note that we propose new formal names in  
 140 the discussion. The criteria for selecting these three genes were as follows: (i) they have clear  
 141 transcriptional expression evidence, (ii) have at least two exons, (iii) their translation is supported by  
 142 ribosome profiling and/or proteomic evidence and (iv) they are specific to the *M. musculus* lineage, *i.e.*,  
 143 have emerged less than 1.5 million years ago (see below). Further, they cover also a range from low to  
 144 high intrinsic structural disorder scores and hydrophobicities, as well as lower to higher expression levels  
 145 (Figures 1C-E; Table 1).

146

147 **Table 1.** General information on the three genes selected for functional analyses.

|                                     | <i>Udng1</i>                                 | <i>Udng2</i>                                     | <i>Udng3</i>                                   |
|-------------------------------------|----------------------------------------------|--------------------------------------------------|------------------------------------------------|
| Protein ID                          | ENSMUSP00000066378                           | ENSMUSP00000069912                               | ENSMUSP00000101431                             |
| Transcript ID                       | ENSMUST00000066163<br>MSTRG.150961.2         | ENSMUST00000065465                               | ENSMUST00000105805                             |
| Gene ID                             | ENSMUSG00000054057                           | ENSMUSG00000053181                               | ENSMUSG00000078518                             |
| Location                            | chr2:18,026,832-18,027,305<br>reverse strand | chr13:48,514,224-48,514,727<br>forward strand    | chr4:138,871,179-138,873,928<br>reverse strand |
| Number of exons                     | 3                                            | 2                                                | 3                                              |
| Number of coding exons              | 1                                            | 1                                                | 3                                              |
| Protein length (amino acid)         | 157                                          | 167                                              | 143                                            |
| Intrinsic structural disorder score | 0.0529                                       | 0.7141                                           | 0.3324                                         |
| Fraction of hydrophobic clusters    | 0.7580                                       | 0.2994                                           | 0.5035                                         |
| Highest FPKM                        | 3.043                                        | 0.630                                            | 0.135                                          |
| Highest expression in               | CNS, limbs                                   | CNS                                              | oviduct <sup>a</sup>                           |
| Pathway / function analysis         | multiple <sup>b</sup>                        | extracellular matrix, cell motility <sup>b</sup> | pre-implantation embryo development            |

148 <sup>a</sup>Table 1 - supplement 1; <sup>b</sup>Table 1 - supplement 2

149



150 *Udng1* shows a relatively high expression (up to FPKM 3) in multiple tissues, with the highest in brain  
151 tissues at different stages as well as in embryonic limbs (Figure 1B; Figure 1- figure supplement 1).  
152 *Udng2* shows on average a lower expression (up to FPKM 0.6), also mostly in brain tissues at different  
153 stages (Figure 1B; Figure 1- figure supplement 1). *Udng3* is only expressed in two tissues, the ovary of 8  
154 weeks old females (FPKM 0.135), as well as the subcutaneous adipose tissue of 8 weeks old animals  
155 (FPKM 0.115) (Figure 1B). Given that the ovary is a very small organ, with closely attached tissues, such  
156 as oviduct and gonadal fat pad, there could be contamination between these different tissue types. Hence,  
157 we were interested whether there is specificity for one of them. We used RT-PCR for the respective  
158 carefully prepared tissue samples for *Udng3* and a control gene (*Ubal*) and found that *Udng3* is not  
159 expressed in the ovary, but predominantly in the oviduct with only a weak signal from the adjacent fat  
160 pad (Table 1- supplement 1).

161

#### 162 *Evolutionary emergence of the three candidate genes*

163 We used whole genome sequencing data (Harr et al., 2016) and Sanger sequencing data of PCR fragments  
164 from mouse populations, subspecies and related species to trace the emergence of the ORFs for the three  
165 candidate genes. We found the respective genomic regions covering the ORFs in all species analyzed,  
166 which include the wood mouse *Apodemus* that has split from the *Mus* lineage about 10 million years ago.  
167 However, in these more distant species, the reading frames are interrupted by early stop codons and/or  
168 non-frame indels. Full reading frames were only found in populations and subspecies of *M. musculus*, but  
169 not in *M. spretus* or *M. spicilegus* as the closest outgroups (Figure 2, Figure 2 - figure supplement 1). This  
170 implies that they have arisen after the split between these species and the *M. musculus* subspecies about  
171 1.5 million years ago (Dejager, Libert, & Montagutelli, 2009). The *M. musculus* subspecies have split  
172 further into three major lineages, *M. m. castaneus*, *M. m. musculus* and *M. m. domesticus* about 0.5  
173 million years ago (Figure 2). The three genes occur in at least two of these lineages (see below), *i.e.*, they  
174 are between 0.5 - 1.5 million years old.

175

176 *Udng1* occurs in all three subspecies and all analyzed populations. The same pattern is seen for *Udng2*,  
177 with the exception that the three *M. m. musculus* populations show a slightly shorter version (153 instead  
178 of 167 amino acids), due to a newly acquired premature stop codon (Figure 2 - figure supplement 1).  
179 *Udng3* is present in *M. m. castaneus* and *M. m. musculus*, while all three *M. m. domesticus* populations  
180 share a derived indel that disrupts its reading frame after 15 amino acids (Figure 2 - figure supplement 1).  
181

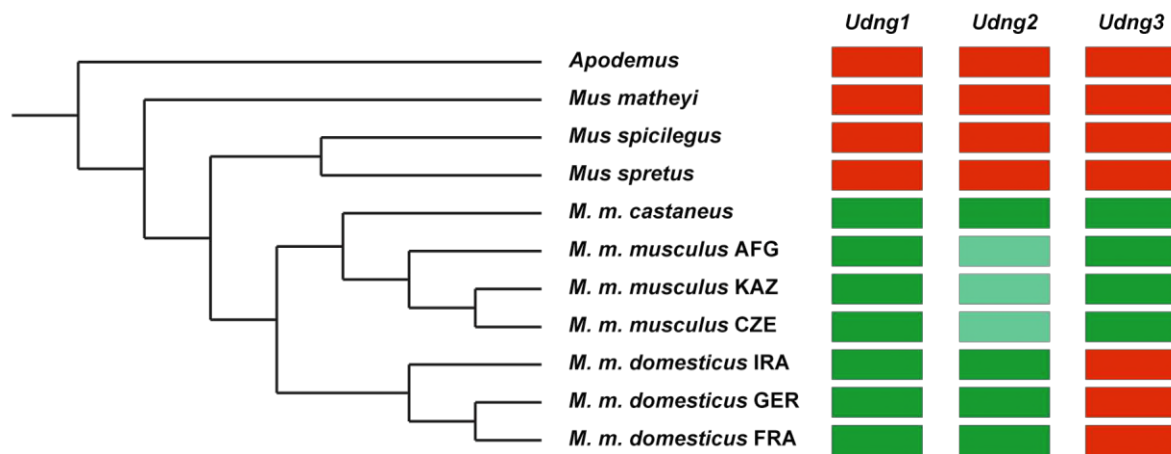

182

183 **Figure 2.** Emergence of the ORFs for the three genes.

184 Left is the phylogenetic tree of the mouse species, subspecies (*Mus musculus* = *M. m.*), and the outgroup  
185 *Apodemus*, derived from whole genome sequence analyses (see Methods). Three populations each  
186 represent *M. m. musculus* (AFG = from Afghanistan, KAZ = from Kazakhstan, CZE = from Czech  
187 Republic) and *M. m. domesticus* (IRA = from Iran, FRA = from France, GER = from Germany). The right  
188 panel shows whether the ORF of each gene is intact or not. Red: not intact, green: intact, light green:  
189 almost intact, *i.e.*, secondary acquisition of a premature stop codon. The alignments of the coding  
190 sequences are provided in Figure 2 - figure supplement 1. The distance matrices are provided in Figure 2 -  
191 figure supplement 2.

192

193 None of the three gene regions show significant signatures of selection (TajD or  $F_{ST}$  analysis) in the  
194 population analyses provided in (Harr et al., 2016). Further, they show too few substitutions (Figure 2 -  
195 supplement 2) to allow a meaningful calculation of dN/dS ratios because of lack of power. To assess  
196 whether they show signs of an accelerated evolution after the acquisition of their ORFs, we have  
197 calculated the distances (*i.e.*, number of substitutions) within the tree of species analyzed. Using *M.*

198 *matheyi* as the out-group, we can compare the average distances to the two species that show no ORF and  
199 should therefore evolve with an approximately neutral rate (*M. spretus* and *M. spicilegus* = non-coding  
200 group) with the average distances to the taxa that have the respective ORF (*M. m. castaneus*, *M. m.*  
201 *musculus* and *M. m. domesticus* = coding group) (see Figure 2 for these relationships). The latter should  
202 show on average more substitutions, if evolution was accelerated due to positive selection after the  
203 acquisition of the ORF. However, we find that this is not the case, the observed number of substitutions is  
204 very similar between both groups (Table 2). However, we noted that *Udng3* shows more substitutions for  
205 both groups. To obtain an estimate for the expected number of substitutions, we have used the average  
206 distances between the taxa derived from whole genome comparisons. These should reflect approximately  
207 the neutral rates, given that most of the genome is not expected to be subject to evolutionary constraints.  
208 The results are also provided in Table 2 (the full matrix of pairwise differences is included in Figure 2 -  
209 figure supplement 2). We find that *Udng1* and *Udng2* evolve at the expected average rate while *Udng3* is  
210 indeed faster than expected. Still, when testing observed versus expected values between each group for  
211 each locus, we find that none of them is significant (Table 2). Hence, in spite of the region specific rate  
212 differences, there are no signs that accelerated evolution through positive selection would have taken  
213 place after the acquisition of the ORFs in any of the three loci. However, we can not exclude that a  
214 selective sweep could have occurred at the time where the ORFs emerged, but this can not be traced  
215 anymore in todays populations.

216

217 **Table 2.** Average numbers of substitutions for each locus compared to *M. matheyi*.

| locus        |                       | non-coding group:<br><i>M. spretus</i> and <i>M. spicilegus</i> | coding group:<br><i>M. musculus</i> taxa | Chi-square P-<br>value (two-tailed) <sup>b</sup> |
|--------------|-----------------------|-----------------------------------------------------------------|------------------------------------------|--------------------------------------------------|
| <i>Udng1</i> | observed              | 24.5                                                            | 27.6                                     | 0.84                                             |
|              | expected <sup>a</sup> | 29.2                                                            | 29.6                                     |                                                  |
| <i>Udng2</i> | observed              | 34.0                                                            | 32.3                                     | 0.92                                             |
|              | expected <sup>a</sup> | 31.4                                                            | 31.9                                     |                                                  |
| <i>Udng3</i> | observed              | 51.0                                                            | 48.3                                     | 0.87                                             |
|              | expected <sup>a</sup> | 25.9                                                            | 26.3                                     |                                                  |

218 <sup>a</sup>value from overall genome divergence as average for the respective sequence length; <sup>b</sup>based on rounded  
219 values  
220

### 221 *Generation of gene knockouts and power analysis*

222 For the further functional characterization of the three genes, we obtained knockout lines. *Udng1* and  
223 *Udng2* represent constructs in which all or most of the ORFs were substituted by *lacZ*, *Udng3* was  
224 generated by creating a frame shift in the ORF through CRISPR/Cas9 mutagenesis. All three lines were  
225 homozygous viable and showed only subtle phenotypes (further details below). We were therefore  
226 interested in studying their impact on the transcriptional network in the tissues in which they are  
227 predominantly expressed. Given the recent evolution of the genes, one would expect only a small  
228 influence. Hence, we first did a power analysis to get an estimate on how deeply we can trace changes in  
229 the networks.

230

231 Several conditions have to be considered for such a power analysis. When using RNA-Seq read count  
232 (fragment count for paired-end sequencing) data, we assume (1) read counts follow a negative binomial  
233 distribution; (2) all samples are sequenced at the same depth; (3) significance level after Bonferroni  
234 adjusted is 0.05 and in total 15,000 genes are tested, *i.e.*, the significance level before adjustment is  $3.3 \times$   
235  $10^{-6}$ . The power to detect a differentially expressed gene can then be estimated by the given (1) sample  
236 size, (2) fold change between knockouts and wildtypes, (3) average read count, and (4) dispersion, which  
237 is the measurement of biological and technical variance considering the effect of mean read count (Figure  
238 3A). Based on this a priori analysis, we used at least 10 biological replicates of knockouts and wildtypes,  
239 performed deep sequencing and minimized variance by using standardized rearing conditions for the mice,  
240 as well as standardized and parallel preparation and sequencing procedures. Under these conditions, it is  
241 expected to be possible to detect significant differences even when the fold-changes are as low as 1.05 to  
242 1.25. We found that these expectations fitted well with our real data described below (Figure 3B and C,  
243 and Figure 3 - figure supplement 1).

244

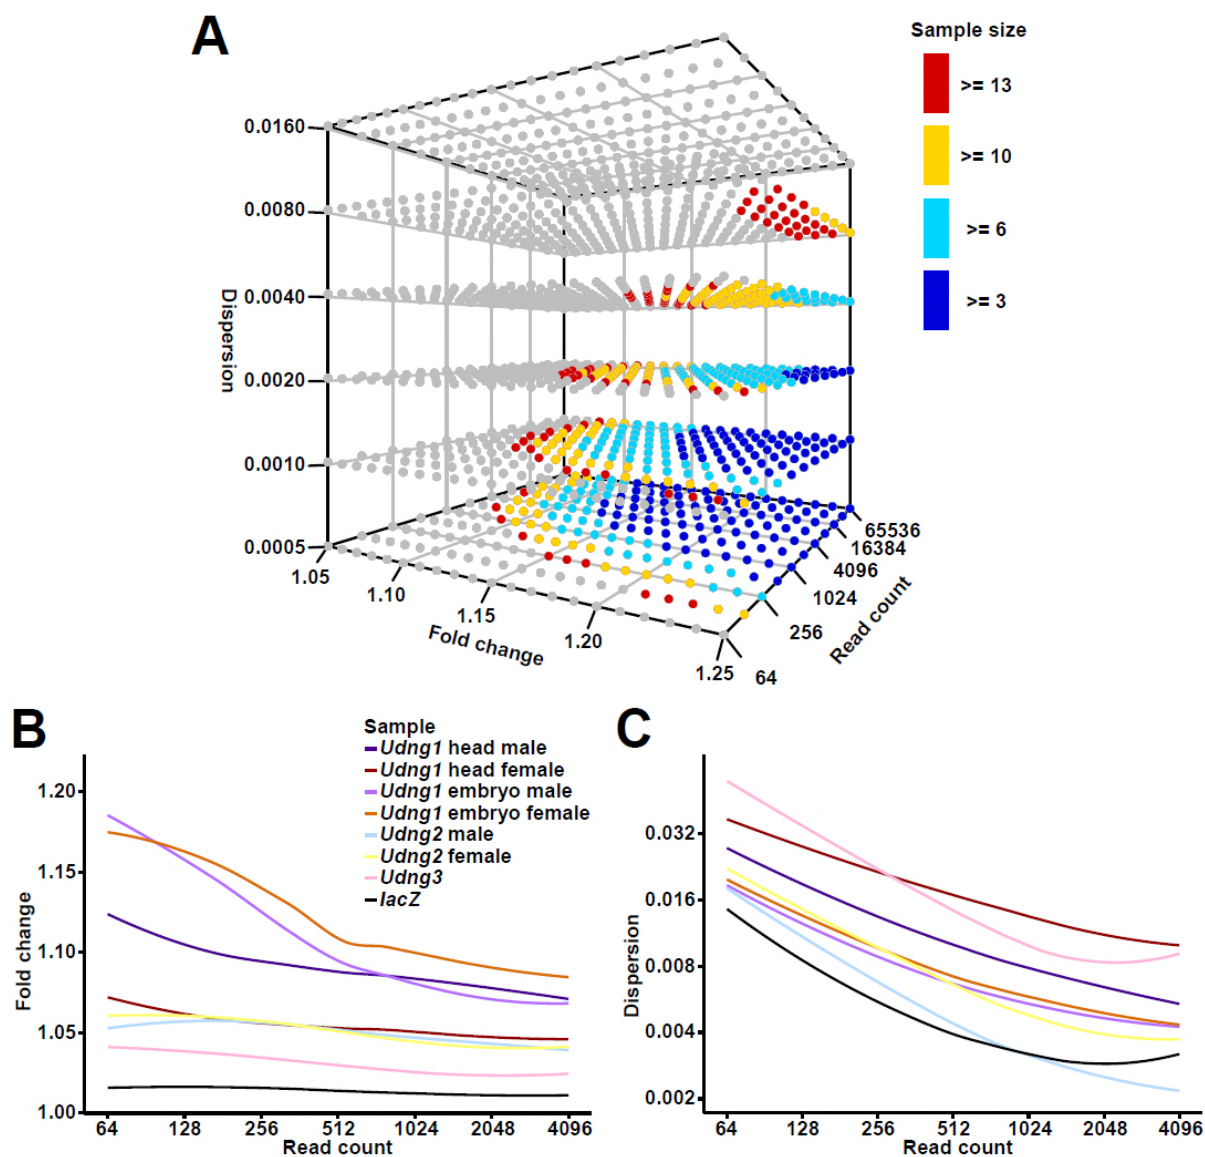

245

246 **Figure 3.** Power analysis and the comparison of the actual RNA-Seq datasets.

247 (A) The theoretically estimated power for each combination of sample size, fold change, read count, and  
 248 dispersion. The three axes represent fold change, read count, and dispersion separately. The grey dots  
 249 represent power lower than 0.8, and the colored dots represent power greater than or equal to 0.8 under  
 250 different sample sizes. (B and C) Curves of fold change (B) and dispersion (C) against read count from  
 251 the actual RNA-Seq datasets, fitted with locally estimated scatterplot smoothing (LOESS) method.  
 252 Values are taken from DESeq2 (read count as baseMean, fold change as  $2^{\lfloor \log_2 \text{FoldChange} \rfloor}$ , and dispersion).  
 253 Numeric details for the actual sample analysis are provided in Figure 3- figure supplement 1.

254

255 *Controls*

256 To assess whether any possible effects on the transcriptome could be caused by the expression of *lacZ* in  
257 *Udng1* and *Udng2*, we conducted a control experiment in cell culture. We transformed primary mouse  
258 embryonic fibroblasts with vectors expressing transcripts containing the *lacZ* ORF in forward and reverse  
259 direction. This was done in 10 parallels for each direction and RNA-Seq data were obtained for each of  
260 them after 48 hrs incubation (*i.e.*, transient expression). The expression of the transcripts including the  
261 *lacZ* ORF in the forward and the reverse directions were confirmed by the unique mapped reads. On  
262 average we could map 54.2 million unique reads per sample (range from 44.2 to 65.8 million reads). We  
263 did not detect any significantly differentially expressed genes in this experiment. This suggests that LacZ  
264 protein expression by itself does not result in traceable changes of the transcriptome. This conclusion  
265 applies of course only to this particular experiment and it could be useful to eventually repeat this in a  
266 whole mouse background. However, another control already inherent in our data is that in the RNA-Seq  
267 data of the heads of postnatal 0.5-day *Udng1* and *Udng2* male pups (see below). Both of these express  
268 *lacZ* but the sets of differentially expressed genes are different (they overlap only in 63 genes, whereby 79  
269 would have been expected by chance).

270

271 The CRISPR/Cas9 experiment to generate our *Udng3* knockout line might have generated potential off-  
272 target mutations. In order to rule out this possibility, we performed whole genome sequencing on both  
273 animals of our founding pair. The female and male of our founding pair were selected from the first  
274 generation offspring of the mating among mosaic and wildtype mice which were directly developed from  
275 the zygotes injected. Each of them contained a 7-bp deletion allele and a wildtype allele. If there were any  
276 off-target sites, they should exist as heterozygous or homozygous indels or single nucleotide variants.  
277 However, in our genome sequencing results, we found no variant located in the 100 bp regions around the  
278 genome-wide 343 predicted off-target sites. Further, we manually checked the reads mapped to the

279 regions around the top 20 predicted sites in both samples and none of them yielded an indication of  
280 variants.

281 In the light of these controls, we conclude that the effects shown for the knockouts in the following can  
282 indeed be ascribed to the knockouts themselves, rather than a confounding factor. We describe the results  
283 for each gene in turn.

284

#### 285 *Udng1* knockout effect on the transcriptome

286 For *Udng1* the replacement construct removes the whole ORF. *Udng1* is broadly expressed across  
287 developmental stages and tissues (Figure 1B, Figure 1 - figure supplement 1). High expression in brain  
288 tissues is seen in embryos and pups and the limbs in embryos (Figure 3 - figure supplement 1). Hence, we  
289 used the heads of postnatal 0.5-day pups and 12.5-day whole embryos for RNA-Seq analysis.

290 We sequenced the heads of 10 postnatal 0.5-day pups from each of the four sex (female or male) and  
291 genotype (homozygous knockout or wildtype) combinations. On average, we could map 74.6 million  
292 unique reads for each sample (range from 59.3 to 89.4 million reads; Figure 3 - figure supplement 1).

293 First we examined whether the *Udng1* transcript was indeed lacking in the knockouts. This is the case:  
294 knockouts show no transcription, but wildtypes show clear transcription (Figure 3 - figure supplement 1).  
295 We also confirmed their genotypes by checking the level of *lacZ* expression (Figure 3 - figure supplement  
296 1). We found 1,719 differentially expressed genes between male knockout and wildtype samples

297 (DESeq2, adjusted P-Value  $\leq 0.01$ , fold changes range from 0.649 to 1.36; Figure 3 - figure supplement  
298 2). Interestingly, we found only one differentially expressed gene between females, *Udng1* itself (DESeq2,  
299 adjusted P-Value  $\leq 0.01$ ). This can be ascribed to a higher dispersion in the female samples (Figure 3C),

300 which results in a loss of power. The reason for the higher dispersion in females in these samples is  
301 currently unclear. Functional enrichment analysis of the 1,718 differentially expressed genes (except for  
302 *Udng1* itself) in males revealed 501 distinct Gene Ontology functional terms and 137 distinct pathways  
303 (KOBAS, corrected P-Value  $\leq 0.05$ ; Table 1 - supplement 2).

304



305 RNA was also obtained from 10 to 14 12.5-day embryos of the four sex (female or male) and genotype  
306 (homozygous knockout or wildtype) combinations. On average, we could map 67.1 million unique reads  
307 per sample (range from 36.9 to 92.7 million reads; Figure 3 - figure supplement 1). Again we confirmed  
308 that the *Udng1* transcript was indeed lacking in the knockouts, and checked the level of *lacZ* expression  
309 (Figure 3 - figure supplement 1). We found 3,855 differentially expressed genes between male knockout  
310 and wildtype samples (DESeq2, adjusted P-Value  $\leq 0.01$ , fold changes range from 0.533 to 1.59; Figure 3  
311 - figure supplement 2) and 6,165 between females (DESeq2, adjusted P-Value  $\leq 0.01$ , fold changes range  
312 from 0.531 to 1.56; Figure 3 - figure supplement 2). Among them, there are 2,998 shared between female  
313 and male samples. Functional enrichment analysis of the common differentially expressed genes revealed  
314 583 distinct Gene Ontology functional terms and 137 distinct pathways (KOBAS, corrected P-Value  $\leq$   
315 0.05; Table 1 - supplement 1). Among the 1,719 differentially expressed genes between male head  
316 samples and the 3,855 ones between male embryo samples, 418 are overlapping. In addition, there are  
317 176 overlapping Gene Ontology functional terms and 17 overlapping pathways between the two datasets.

318

### 319 *Udng1* knockout effect on mouse behavior and limb length

320 The relatively high expression of *Udng1* in the CNS and the RNA-Seq results of the heads of postnatal  
321 pups indicate that it may have an effect on the behavior of the mice. We performed three standardized  
322 behavioral tests: elevated plus maze, open field, and novel object to test this possibility. We found a  
323 significant difference for the open field test with respect to total distance moved (nested ranks test, P-  
324 Value = 0.0023; Table 3; full data in Table 3 - supplement 1).

325

326 Given that *Udng1* is also expressed in limbs, we asked whether there would also be differences in limb  
327 morphology. We scanned the skeletons of the respective wildtype and knockout mice and analyzed their  
328 bone lengths, following the procedures described in (Skrabar, Turner, Pallares, Harr, & Tautz, 2018). We  
329 found that the knockout mice had significantly longer metatarsals (two-tailed Wilcoxon rank sum test, P-



330 Value = 0.020) and significantly shorter metacarpals (two-tailed Wilcoxon rank sum test, P-Value =  
 331 0.043), and in tendency also longer tibias (Table 3; full data in Table 3 - supplement 1)

332

333 **Table 3.** Phenotyping results for *Udng1* and *Udng2*.

| Test                         | Parameter              | <i>Udng1</i>   |                 |                 |                      | <i>Udng2</i>   |                 |                 |                      |
|------------------------------|------------------------|----------------|-----------------|-----------------|----------------------|----------------|-----------------|-----------------|----------------------|
|                              |                        | N <sup>a</sup> | KO <sup>b</sup> | WT <sup>b</sup> | P-Value <sup>c</sup> | N <sup>a</sup> | KO <sup>b</sup> | WT <sup>b</sup> | P-Value <sup>c</sup> |
| Elevated plus maze           | center time (%)        | 40             | 11.9            | 10.8            | 0.19                 | 36             | 10.8            | 14.8            | 0.029                |
|                              | dark time (%)          | 40             | 54.1            | 56.7            | 0.20                 | 36             | 63.2            | 58.3            | 0.072                |
|                              | light time (%)         | 40             | 31.0            | 28.5            | 0.15                 | 36             | 21.7            | 20.5            | 0.45                 |
| Open field                   | wall time (%)          | 40             | 51.4            | 44.7            | 0.24                 | 12             | 58.6            | 49.5            | 0.29                 |
|                              | total distance (m)     | 40             | 42.1            | 48.0            | 0.0023               | 12             | 31.7            | 35.0            | 0.29                 |
| Novel object                 | first contact time (s) | 40             | 2.5             | 5.0             | 0.26                 | 12             | 0.0             | 0.0             | 0.30                 |
|                              | object visits (N)      | 40             | 4.0             | 3.0             | 0.14                 | 12             | 0.0             | 0.0             | 0.39                 |
|                              | total distance (m)     | 40             | 28.2            | 30.1            | 0.35                 | 12             | 25.7            | 25.1            | 0.53                 |
| Limb elements (length in mm) | humerus                | 40             | 11.96           | 11.96           | 0.93                 | n.d.           |                 |                 |                      |
|                              | ulna                   | 40             | 13.86           | 13.83           | 0.37                 | n.d.           |                 |                 |                      |
|                              | metacarpal             | 40             | 3.20            | 3.22            | 0.043                | n.d.           |                 |                 |                      |
|                              | femur                  | 40             | 15.34           | 15.44           | 0.21                 | n.d.           |                 |                 |                      |
|                              | tibia                  | 40             | 17.37           | 17.21           | 0.072                | n.d.           |                 |                 |                      |
|                              | metatarsal             | 40             | 7.43            | 7.29            | 0.020                | n.d.           |                 |                 |                      |

334 <sup>a</sup>N = total number of individuals used, equally divided between knockouts and wildtypes.

335 <sup>b</sup>Medians across all individuals.

336 <sup>c</sup>P-Values for the behavior phenotypes were calculated using nested ranks tests representing a non-  
 337 parametric linear mixed model; for the data having only one group, it is essentially identical to a one-  
 338 tailed Wilcoxon rank sum test. For the limb length measurements we use a two-tailed Wilcoxon rank sum  
 339 test.

340 Table 3 - supplement 1 provides the details of the phenotype scores.

341

342 This raises the question whether the limb length phenotype could cause the "distance moved" phenotype

343 in the open field test (see above). However, given that "distance moved" was also recorded in the novel

344 object test and showed no significant difference between WT and KO (see also discussion), we do not

345 consider the small differences in limb length elements as factors that would impair movement. Hence, it is

346 more likely that these phenotypes are independent of each other and relate to the different expression

347 aspects in limbs and brains.

348

349 *Udng2* knockout effect on the transcriptome

350 For *Udng2* the replacement construct removes 502 out of 504 base pairs of its ORF. *Udng2* is expressed  
351 in brain tissues at different stages (Figure 1B, Figure 1 - figure supplement 1) and we targeted the RNA-  
352 Seq analysis to the heads of postnatal 0.5-day pups. We sequenced the heads of 10 individuals each of the  
353 four sex (female or male) and genotype combinations (homozygous knockout or wildtype). On average,  
354 we could map 64.7 million unique reads for each sample (range from 57.0 to 74.4 million reads; Figure 3  
355 - figure supplement 1). We confirmed that the *Udng2* transcript was indeed lacking in the knockouts, and  
356 checked the level of *lacZ* expression (Figure 3 - figure supplement 1). We found 1,399 differentially  
357 expressed genes between male knockout and wildtype samples (DESeq2, adjusted P-Value  $\leq 0.01$ ; fold  
358 changes range from 0.720 to 1.38; Figure 3 - figure supplement 2), but only 160 between females  
359 (DESeq2, adjusted P-Value  $\leq 0.01$ ; fold changes range from 0.757 to 1.33; Figure 3 - figure supplement  
360 2). Similarly as seen in the *Udng1* analysis, we find a higher dispersion among the female samples that  
361 lowers the power of detection. Functional enrichment analysis of the differentially expressed genes in  
362 males reveals 306 distinct Gene Ontology functional terms and 14 pathways. All the pathways are related  
363 to extracellular matrix or cell motility functions (KOBAS, corrected P-Value  $\leq 0.05$ ; Table 1 -  
364 supplement 1).

365

366 *Udng2* knockout effect on mouse behavior

367 The RNA-Seq results of the heads of postnatal pups indicate that *Udng2* may be involved in mouse  
368 behavior too. We performed the same four behavioral tests as for *Udng1*. We found significant effects in  
369 the elevated plus maze test (Table 3 and Table 3 - supplement 1), but note that only fewer animals were  
370 available for the other tests. We found that knockout males stayed shorter in the center (nested ranks test,  
371 P-Value = 0.029), indicating a decision-making related phenotype (Cruz, Frei, & Graeff, 1994; Fernandes  
372 & File, 1996; Rodgers & Johnson, 1995) and they stayed longer in the dark arms (nested ranks test, P-  
373 Value = 0.072), indicating an anxiety related phenotype (Walf & Frye, 2007) (Table 3).

374

375 *Udng3* knockout effect on the transcriptome

376 The *Udng3* knockout line was generated using CRISPR/Cas9 mutagenesis in a laboratory strain that is  
377 nominally derived from *M. m. domesticus* (C57BL/6N). As pointed out above, *M. m. domesticus*  
378 populations have already a disabling mutation for *Udng3*. However, C57BL/6N is known to carry also  
379 alleles from *M. m. musculus* (Yang et al., 2011) and the *Udng3* allele represents indeed the non-  
380 interrupted version that is found in *M. m. musculus* and *M. m. castaneus*. The CRISPR/Cas9 treatment  
381 introduced a 7-bp deletion at the beginning of the ORF (position 41-47) causing a frame shift and a  
382 premature stop codon in exon 2. Given the observation that *Udng3* is specifically expressed in adult  
383 oviducts (see above), we focused the RNA-Seq analysis on the oviducts of 12 knockout and 12 wildtype  
384 females (10-11 weeks old). There were on average 75.9 million unique mapped reads per sample (range  
385 from 57.5 to 93.0 million reads; Figure 3 - figure supplement 1). The genotypes of the 24 samples were  
386 further confirmed by the reads covering the sites in which the 7-bps deletion locates. In the initial analysis  
387 involving all samples, we found no differentially expressed gene between knockouts and wildtypes.

388

389 However, given that the expression in oviducts should be fluctuating according to estrous cycle, we  
390 clustered the transcriptomes of the individuals based on both principle component analysis (PCA) and  
391 hierarchical clustering methods, which allowed to distinguish three major clusters (Figures 4A and 4B).  
392 To confirm that these correspond to three different phases of the estrous cycle, we analyzed the  
393 expression of three known cycle dependent genes in the respective clusters, progesterone receptor (*Pgr*)  
394 and estrogen receptors (*Esr1* and *Gper1*). We found that these genes change indeed in the expected  
395 directions, both in the wildtype as well as the knockout animals (Figures 4C-E). Based on this finding, we  
396 performed the differential expression analysis on the three clusters separately. We found 21 differentially  
397 expressed genes in cluster 1 (DESeq2, adjusted P-Value  $\leq 0.01$ ; fold changes range from 0.75 to 1.59;  
398 Figure 3 - figure supplement 2), but still none for clusters 2 and 3. This suggests that *Udng3* acts mostly

399 during the phase of high progesterone receptor and estrogen receptor 1 expression, and low G protein-  
400 coupled estrogen receptor 1 expression.  
401 The top three differentially expressed genes belong all to a single young gene family, namely *Dcpp1*  
402 (ENSMUSG00000096445), *Dcpp2* (ENSMUSG00000096278) and *Dcpp3* (ENSMUSG00000057417),  
403 all three of which were significantly up-regulated in the knockout samples (DESeq2, fold changes: 1.45  
404 for *Dcpp1*, 1.47 for *Dcpp2*, and 1.59 for *Dcpp3*, Figure 3 - figure supplement 2). These genes are  
405 specifically expressed in female and male reproductive organs and the thymus, and were previously found  
406 to function in oviducts to stimulate pre-implantation embryo development (Lee, Xu, Lee, & Yeung, 2006).

407

#### 408 *Udng3* knockout phenotype

409 Given that the *Dcpp* genes are more highly expressed in *Udng3* knockouts, one could predict a higher  
410 implantation frequency of embryos, as it has been shown through experimental manipulation of *Dcpp*  
411 levels (Lee et al., 2006). We assessed the litters of pairs that were produced during our breeding  
412 experiments and found that the first litters from homozygous knockout females were produced after the  
413 same time as those from wildtype or heterozygous females (medians: 23 vs. 22 days; Table 3 -  
414 supplement 1), while we found that the second litters from homozygous knockout females were produced  
415 faster than those from wildtype or heterozygous females (medians: 23 vs. 38 days; Table 3 - supplement  
416 1). To test this under more controlled conditions, we set up 10 mating pairs of homozygous knockout  
417 females with wildtype males and 10 wildtype pairs for control, all at approximately the same age at the  
418 start (8-9 weeks old). We found that the knockout and wildtype pairs had their first litter after the same  
419 time (medians: 23 vs. 22 days; Table 3 - supplement 1), while the knockout females had their second litter  
420 after a shorter time (medians: 24 vs. 36 days; Table 3 - supplement 1). Combining the total result from 36  
421 mating pairs, we find that this difference is significant (two-tailed Wilcoxon rank sum test, P-Value =  
422 0.042).

423

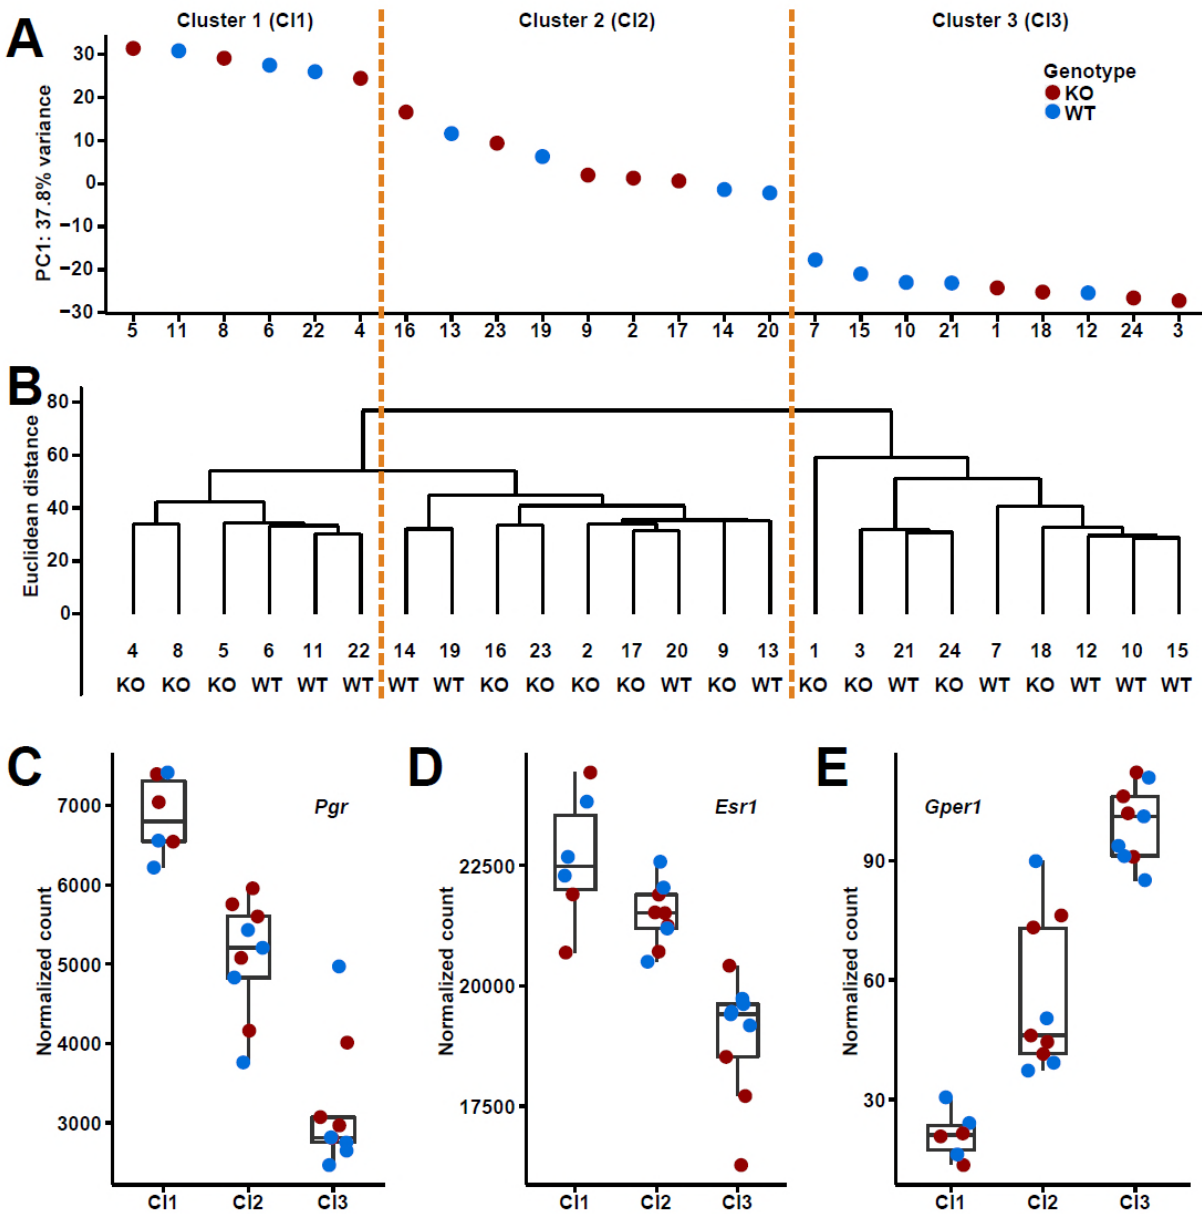

424

425 **Figure 4.** Clusters and expression levels in the 24 RNA-Seq samples of oviducts.

426 (A) PC1 values from the PCA analysis, (B) hierarchical clustering result. Sample codes and genotypes are  
 427 listed along X-axis. The 24 samples are assigned into three clusters accordingly. (C-E) The expression  
 428 levels of three sex hormone receptor genes (*Pgr*, *Esr1*, *Gper1*) are shown by box plots. Figure 4 - figure  
 429 supplement 1 shows the deletion patterns in the *Dcpp* gene region of the different populations (see text).

430

431 Interestingly, we found not only a timing difference for the second litter but also infanticide in about a

432 quarter of the litters (4 out of 16) from homozygous females, but none in heterozygous or wildtype ones

433 (two-tailed Fisher's exact test, P-Value = 0.031; Table 3 - supplement 1). This could indicate that when  
434 the second litter follows too quickly, the females may be under strong postpartum stress resulting in  
435 partial killing of pups.  
436 These results suggest that the loss of the *Udng3* gene should be detrimental to the animals in the wild.  
437 Still, we see that the *M. m. domesticus* populations have secondarily lost this gene (Figure 2). Intriguingly,  
438 when inspecting the copy number variation data that we have produced previously (Pezer, Harr, Teschke,  
439 Babiker, & Tautz, 2015), we found that *Dcpp3* was also lost in *M. m. domesticus* populations (Figure 4 -  
440 figure supplement 1). Under the assumption that this results in an overall lowered expression of *Dcpp*  
441 RNAs, it could be considered to compensate for the loss of *Udng3*.

442

443

444

## 445 **Discussion**

446 The aim of this study was to show that genes that have evolved only very recently out of previous non-  
447 coding regions can directly have a function, without further evolutionary adaptation. Out of a list of 119  
448 candidate genes that have evolved *de novo* in the mouse lineage, we have chosen three more or less at  
449 random, only with the criterion to be particularly young and to represent different structural features and  
450 expression. We find that all three have an impact on the transcriptome and for all three we find traceable  
451 phenotypes related to their expression patterns when knocked out. Although the effects are subtle, at an  
452 evolutionary scale they can make a difference to the animals carrying them. Hence, we propose to give  
453 formal names to these genes. We name them after figures which emerged *de novo* as mythology  
454 characters in the Chinese classical novels *Journey to the West* and *Investiture of the Gods*, which were  
455 published in the 16th century. We name *Udng1* as *Sunwukong* (*Swk*, born from stone, *Journey to the*  
456 *West*), *Udng2* as *Leizhenzi* (*Lzhz*, born from thunderstorm, *Investiture of the Gods*), and *Udng3* as *Shiji*  
457 (*Shj*, born from stone, female, *Investiture of the Gods*).

458

459 *Functional de novo gene emergence*

460 It has long been assumed that the emergence of function out of non-coding DNA regions must be rare,  
461 and if it occurs, the resulting genes would be far away from assuming a function. Our results do not  
462 support these assumptions. It is easy to find many well supported transcripts that could be considered to  
463 be true *de novo* genes. And three out of three chosen such genes can be shown to have functions. Hence,  
464 it would seem likely that most of the candidate genes in our curated list contribute aspects to the  
465 phenotype. Further, the fact that we neither observe patterns of ongoing positive selection, nor  
466 specifically accelerated evolution around these genes, suggests that they did not need additional  
467 adaptation to become functional. Although they have acquired a few additional substitutions, these are  
468 within the range of fixation of new neutral substitutions. This is in line with a similar analysis on a larger  
469 set of *de novo* ORFs in the mouse (Ruiz-Orera et al., 2018).

470 Our previous experiment with expressing random sequences in *E. coli* (Neme et al., 2017) had also  
471 suggested that the majority of them are not neutral, *i.e.*, they had an effect on the growth rates of the cells  
472 that carried them. We consider the question of whether this was a positive or negative effect as secondary  
473 (Tautz & Neme, 2018), since the evolutionary relevance is always in the context of other genes. This is  
474 best exemplified by *Udng3 / Shj*. This has apparently a negative effect on the expression of its target  
475 genes. But through this negative effect, it provides apparently a life history advantage to the mice carrying  
476 it, since it suppresses too fast gestation that would otherwise have been caused by the duplicated genes.  
477 Thus, a negative effect results in a positive function in evolution.

478 We note also that an experiment that has expressed random peptides in plant (*Arabidopsis*) had a very  
479 high success rate of identifying associated phenotypes (Bao, Clancy, Carvalho, Elliott, & Folta, 2017).  
480 One of the peptides that were functionally studied by these authors mediates an early flowering phenotype,  
481 which would self-evidently be a possible function for an ecological adaptation.

482

483

484

485 *Transcriptome changes and phenotypes*

486 The fact that we see the disturbance of a whole transcriptomic network in the knockouts should of course  
487 not be interpreted to mean that the new genes interact directly with all of these other genes. We expect  
488 that even a single or a few interactions with other genes that are already part of a network could trigger  
489 this. Since our experimental design allowed a very high sensitivity to detect this, we were able to see the  
490 disturbance of many further interacting genes. We emphasize that the power of our analysis is much  
491 higher than in most transcriptomic studies, *i.e.*, we can see effects that would otherwise not be noted.  
492 For *Udng2 / Lzhz* the disturbed network has some functional coherence (extracellular matrix or cell  
493 motility functions), while the *Udng1 / Swk* knockout results in rather broad effects. The fact that much  
494 fewer gene expression changes are seen for *Udng3 / Shj* can be explained by the reduced power that we  
495 had in this experiment, due to the need to separate the data into three clusters. Similarly, the differences  
496 between females and males in the postnatal samples may be entirely due to different dispersions, rather  
497 than to sex-specific effects. But this question will need further study.

498

499 *Phenotype changes*

500 None of the three knockout lines showed an overt phenotype, but we considered this also as *a priori*  
501 unlikely, given that a *de novo* evolved gene is expected to be only added to an existing network of genes.  
502 However, given the observed transcriptome changes, we were encouraged to apply a small set of  
503 phenotypic tests, relating to the respective major expression patterns of the genes. However, we consider  
504 the results from these tests only as preliminary at this stage. The behavioral tests in particular could be  
505 influenced by a variety of factors and would need repetition in much larger numbers. For example, the  
506 fact that "total distance" moved was measured in two behavioral tests (open field and novel object tests),  
507 but showed a significant difference in only one of the tests for *Udng1 / Swk* suggests a higher complexity.  
508 But at least the tendency was the same in both tests (shorter distance in knockouts). Still, we decided to  
509 not extend these tests for a larger number of *Udng2* mice.



510 For *Udng3 / Shj* we identified a possible direct link between the identified phenotype of a shorter  
511 gestation length in the knockouts and the transcriptomic changes. We found that the expression level of  
512 all three copies of *Dcpp* genes in C57BL/6N mice are enhanced in the *Udng3 / Shj* knockout animals.  
513 *Dcpp* expression is induced in the oviduct by pre-implantation embryos and is then secreted into the  
514 oviduct. This in turn stimulates the further maturation of the embryos and eventually the implantation  
515 (Lee et al., 2006). Hence, this is a system where a selfish tendency of embryos in expense of the resources  
516 of the mothers could develop. Accordingly, *Udng3 / Shj* could have found its function in controlling this  
517 expression. Intriguingly, the secondary loss of *Udng3 / Shj* in *M. m. domesticus* populations is  
518 accompanied by a loss of *Dccp3* in the same populations. This is compatible with the notion that an  
519 evolutionary conflict of interest exists for these interactions, whereby it remains open whether the loss of  
520 *Dccp3* preceded the loss of *Udng3 / Shj* or vice versa.

521

## 522 *Conclusion*

523 The notion that networks of gene interaction are far reaching and may have collective phenotypic effects  
524 has also been suggested in the context of quantitative trait genetics (Barton, Etheridge, & Veber, 2017;  
525 Boyle, Li, & Pritchard, 2017; Turelli, 2017). These authors have suggested that quantitative traits are  
526 eventually influenced by very many, if not all expressed genes. They emphasize also that modifying  
527 networks may be even more important than core networks in shaping quantitative phenotypes. Within the  
528 framework of such a concept, it is easy to see how a *de novo* evolved gene could integrate anywhere in  
529 the networks and lead to the subtle, but measurable perturbations on a whole set of genes, as shown in our  
530 data.

531

532

## 533 **Materials and Methods**

### 534 *Ethics statement*

535 The behavioral studies were approved by the supervising authority (Ministerium für Energiewende,  
536 Landwirtschaftliche Räume und Umwelt, Kiel) under the registration numbers V244-71173/2015, V244-  
537 4415/2017 and V244-47238/17. Animals were kept according to FELASA (Federation of European  
538 Laboratory Animal Science Association) guidelines, with the permit from the Veterinäramt Kreis Plön:  
539 1401-144/PLÖ-004697. The respective animal welfare officer at the University of Kiel was informed  
540 about the sacrifice of the animals for this study.

541

### 542 *Genome-wide identification of de novo genes*

543 We modified previous phylostratigraphy and synteny-based methods to identify *Mus*-specific *de novo*  
544 protein-coding genes from intergenic regions. We started with mouse proteins annotated in Ensembl  
545 (Version 80) (Zerbino et al., 2018) (1) with protein length not smaller than 30 amino acids, (2) with a start  
546 codon at the beginning of the ORF, (3) with a stop codon at the end of the ORF, (4) without stop codons  
547 within the annotated ORF. For the phylostratigraphy-based strategy, in order to save computational time,  
548 we first used NCBI BLASTP (2.5.0+) to align low complexity region masked mouse protein sequences to  
549 rat protein sequences annotated in Ensembl (Version 80) and filtered out the mouse sequences having hits  
550 with E-values smaller than  $1 \times 10^{-7}$ . This removes all conserved genes. Next we used NCBI BLASTP  
551 (2.5.0+) to align the remaining low complexity region masked sequences to NCBI nr protein sequences  
552 (10 Nov. 2016) (O'Leary et al., 2016) and filtered out the mouse sequences having non-genus *Mus* hits  
553 with E-values smaller than  $1 \times 10^{-3}$  according to (Neme & Tautz, 2013). The genes remaining after these  
554 filtering steps are the candidates for the *de novo* evolved genes. In order to deal also with proteins having  
555 low complexity regions, we further applied a synteny-based strategy on the rest proteins by taking  
556 advantage of the Chain annotation from Comparative Genomics of UCSC Genome Browser  
557 ("<http://genome.ucsc.edu/>") (Kent et al., 2002). We filtered out the proteins encoded on unassembled

558 scaffolds because their chromosome information is not compatible between Ensembl and UCSC  
559 annotations. We only compared rat and human proteins with mouse proteins because their genomes are  
560 well assembled and genes are well annotated. We performed the same procedures on rat and human data  
561 separately, and used “mm10.rn5.all.chain” and “rn5ToRn6.over.chain” from UCSC and gene annotation  
562 from Ensembl (Version 80) for rat, and “mm10.hg38.all.chain” from UCSC and gene annotation from  
563 Ensembl (Version 80) for human. For each mouse gene, if its ORF overlaps with any ORFs in the rat or  
564 human mapping regions in Chain annotation, we aligned its protein sequence to those protein sequences  
565 with program water from EMBOSS (6.5.7.0) (Rice, Longden, & Bleasby, 2000); if one of the alignment  
566 scores is not smaller than 40, we filtered out the protein. The remaining 119 genes are the candidates for  
567 the following analysis and the pool for us to select genes for detailed functional experiments.

568

#### 569 *ENCODE RNA-Seq analysis*

570 We downloaded the raw read files of 135 strand-specific paired-end RNA-Seq samples generated by the  
571 lab of Thomas Gingeras, CSHL from ENCODE (Consortium, 2012; Sloan et al., 2016) including 35  
572 tissues from different organs and different developmental stages, and each of them had multiple  
573 biological or technical replicates (see list in Figure 1 - figure supplement 2). We trimmed the raw reads  
574 with Trimmomatic (0.35) (Bolger, Lohse, & Usadel, 2014), and only used paired-end reads left for the  
575 following analyses. We mapped the trimmed reads to the mouse genome GRCm38 (Mouse Genome  
576 Sequencing et al., 2002; Zerbino et al., 2018) with HISAT2 (2.0.4) (Kim, Langmead, & Salzberg, 2015)  
577 and SAMtools (1.3.1) (H. Li et al., 2009), and took advantage of the mouse gene annotation in Ensembl  
578 (Version 80) by using the --ss and --exon options of hisat2-build. We assembled transcripts in each  
579 sample, and merged annotated transcripts in Ensembl (Version 80) and all assembled transcripts with  
580 StringTie (1.3.4d) (Pertea et al., 2015). Then we estimated the abundances of transcripts, FPKM values, in  
581 each sample with StringTie (1.3.4d). For each tissue, we summarized the FPKM values of each transcript  
582 by averaging the values from multiple biological or technical replicates; and if a gene has multiple

583 transcripts, we assigned the summary of the FPKM values of the transcripts as the transcriptional  
584 abundance of the gene.  
585  
586 *Ribosome profiling and proteomics analysis*  
587 We downloaded the datasets that included both strand-specific ribosome profiling (Ribo-Seq) and RNA-  
588 Seq experiments of the same mouse samples from Gene Expression Omnibus (Barrett et al., 2013) under  
589 accession numbers GSE51424 (Gonzalez et al., 2014), GSE72064 (Cho et al., 2015), GSE41426 (Djiane  
590 et al., 2013), GSE22001 (Guo, Ingolia, Weissman, & Bartel, 2010), GSE62134 (Diaz-Munoz et al., 2015),  
591 and GSE50983 (Castaneda et al., 2014), which corresponded to brain, hippocampus, neural ES cells, heart,  
592 skeletal muscle, neutrophils, splenic B cells, and testis. Ribo-seq datasets were depleted of possible rRNA  
593 contaminants by discarding reads mapped to annotated rRNAs, and then the rest reads were mapped to  
594 GRCm38 (Mouse Genome Sequencing et al., 2002; Zerbino et al., 2018) with Bowtie2 (2.1.0) (Langmead  
595 & Salzberg, 2012). RNA-Seq reads were mapped to the mouse genome GRCm38 with TopHat2 (2.0.8)  
596 (Kim et al., 2013). Then we applied RiboTaper (1.3) (Calviello et al., 2016) which used the triplet  
597 periodicity of ribosomal footprints to identify translated regions to the bam files. Mouse GENCODE  
598 Gene Set M5 (Ensembl Version 80) (Mudge & Harrow, 2015) was used as gene annotation input. The  
599 Ribo-seq read lengths to use and the distance cutoffs to define the positions of P-sites were determined  
600 from the metaplots around annotated start and stop codons as shown below.

601

| <b>Sample</b>   | <b>Read lengths</b>        | <b>Offsets</b>             |
|-----------------|----------------------------|----------------------------|
| Brain           | 29,30                      | 12,12                      |
| Hippocampus     | 29,30                      | 12,12                      |
| Neural ES cells | 27,28,29,30                | 12,12,12,12                |
| Heart           | 29,30                      | 12,12                      |
| Skeletal muscle | 29,30                      | 12,12                      |
| Neutrophils     | 25,26,27,28,29,30,31,32,33 | 12,12,12,12,12,12,12,12,12 |
| Splenic B cells | 30,31                      | 12,12                      |
| Testis          | 28                         | 12                         |

602

603 All mouse peptide evidence from large-scale mass spectrometry studies was retrieved from PRIDE (09  
604 Aug. 2015) (Vizcaino et al., 2016) and PeptideAtlas (31 Jul. 2015) (Desiere et al., 2006) databases. We  
605 performed the same procedures on PRIDE and PeptideAtlas data separately following the method  
606 described in (Xie et al., 2012). In brief, if the whole sequence of a peptide was identical to one fragment  
607 of the tested *de novo* protein sequence, and had at least two amino acids difference compared to all the  
608 fragments of other protein sequences in the mouse genome, the peptide was considered to be convincing  
609 evidence for the translational expression of the respective *de novo* protein.

610

#### 611 *Molecular patterns of de novo genes*

612 The exon number of a gene was assigned as the exon number of the transcript having highest FPKM  
613 value among all the transcripts of the gene. The intrinsic structural disorder of proteins was predicted  
614 using IUPred (Dosztanyi, Csizmok, Tompa, & Simon, 2005), long prediction type was used. The intrinsic  
615 structural disorder score of a protein was assigned as the average of the scores of all its amino acids. The  
616 hydrophobic clusters of proteins were predicted using SEG-HCA (Faure & Callebaut, 2013), and then the  
617 fraction of the sequence covered by hydrophobic clusters for each protein was calculated.

618

#### 619 *RT-PCR*

620 The ovaries, oviducts, uterus, and gonadal fat pad from wildtype *Udng3* females were carefully collected  
621 and immediately frozen in liquid nitrogen. Total RNAs from those tissues were purified using QIAGEN  
622 RNeasy Microarray Tissue Mini Kit (Catalog no. 73304), and the genomic DNAs were removed using  
623 DNase I, RNase-free (Catalog no. 74106). The first strand cDNAs were synthesized using the Thermo  
624 Scientific RevertAid First Strand cDNA Synthesis Kit (Catalog no. K1622) by targeting poly-A mRNAs  
625 with oligo dT primers. Two pairs of primers targeted on the two junctions of the *Udng3* gene structure  
626 and a pair of primers targeted on a control gene *Uba1* were used. The sequences of the primers are shown  
627 below. PCR was done under standard conditions for 38 cycles.

628

| Primer name   | Sequence (5' > 3')    |
|---------------|-----------------------|
| Udng3_junc1_F | GGACACAGGCCAGGGAAATG  |
| Udng3_junc1_R | CCTTAGGCCTTGCGAAGGAA  |
| Udng3_junc2_F | GCCTGCTTTCACCATTTCAGG |
| Udng3_junc2_R | TATGAAAGGCTGGGTGAGGTG |
| Uba1_F        | GAAGATCATCCCAGCCATTG  |
| Uba1_R        | TTGAGGGTCATCTCCTCACC  |

629

630 *Genomic sequences of Udng1, Udng2, and Udng3 loci from wild mice*

631 The genomic sequences from *M. spretus* (8 individuals), *M. m. castaneus* (10 individuals), *M. m.*

632 *musculus* from Kazakhstan (8 individuals), *M. m. musculus* from Afghanistan (6 individuals), *M. m.*

633 *musculus* from Czech Republic (8 individuals), *M. m. domesticus* from Iran (8 individuals), *M. m.*

634 *domesticus* from Germany (11 individuals), and *M. m. domesticus* from France (8 individuals) were

635 retrieved from the whole genome sequencing data in (Harr et al., 2016).

636 The genomic sequences from *A. uralensis* (4 individuals), *M. mattheyi* (4 individuals), and *M. spicilegus*

637 (4 individuals) were determined by Sanger sequencing of the PCR fragments from the genomic DNAs

638 purified with salt precipitation. The PCR primers listed below were designed according to the whole

639 genome sequencing data of the three species in (Neme & Tautz, 2016). There were only few reads from

640 the *A. uralensis* whole genome sequencing data mapped to the *Udng3* locus in the reference genome, and

641 we did not design primers to try to determine the sequences, because the *A. uralensis* genomic sequence

642 at this locus is very different from the reference (*M. m. domesticus*), and the *Udng3* ORF does not exist.

643

| Gene                | Fragment            | Species              | Direction | Sequence (5' > 3')            |
|---------------------|---------------------|----------------------|-----------|-------------------------------|
| <i>Udng1</i>        | 1                   | <i>M. spicilegus</i> | Forward   | GAGACCACGTCTACTTCCAGG         |
|                     |                     | <i>M. mattheyi</i>   | Reverse   | GAGACCACGTCTACTTCCAGG         |
|                     |                     | <i>A. uralensis</i>  |           |                               |
| <i>Udng2</i>        | 1                   | <i>M. spicilegus</i> | Forward   | CACTTCTTGGTTGTAACAGAAAGAC     |
|                     |                     | <i>M. mattheyi</i>   | Reverse   | GTAAACAATTTGATCTTTTCTAGGCTTAG |
|                     | <i>A. uralensis</i> |                      |           |                               |
|                     | 2                   | <i>M. spicilegus</i> | Forward   | AGAAGTCAACAGGGACCAGATTC       |
|                     |                     | <i>M. mattheyi</i>   |           |                               |
| <i>A. uralensis</i> |                     |                      |           |                               |
|                     |                     | <i>M. spicilegus</i> | Reverse   | AGAGGGCATCTGATCCTTGG          |

|       |   | <i>M. mattheyi</i>   |                                       |
|-------|---|----------------------|---------------------------------------|
|       |   | <i>A. uralensis</i>  | Reverse AGAGAGCATCTGATCCTTAGAAC       |
| Udng3 | 1 | <i>M. spicilegus</i> | Forward CAATATACAGACTTATACCAATGAAAACC |
|       |   | <i>M. mattheyi</i>   | Reverse TGGGATCCTTAAGGTTTCATTGTG      |
|       | 2 | <i>M. spicilegus</i> | Forward CCAGAGACCTCTGGATTTC           |
|       |   | <i>M. mattheyi</i>   | Reverse AAGGCACATCTCAAAGTAAAAGC       |

644

645 *Phylogenetic distance analysis*

646 Whole genome sequencing data in (Harr et al., 2016) and (Neme & Tautz, 2016) were used to obtain the  
647 average distances for the taxa in this analysis. For each individual, the mean mapping coverage was  
648 calculated using ANGSD (0.921-10-g2d8881c) (Korneliussen, Albrechtsen, & Nielsen, 2014) with the  
649 options “-doDepth 1 -doCounts 1 -minQ 20 -minMapQ 30 -maxDepth 99999”. Then, ANGSD (0.921-10-  
650 g2d8881c) was used to extract the consensus sequence for each population accounting for the number of  
651 individuals and the average mapping coverage per population (mean + 3 times standard deviation) with  
652 the options “-doFasta 2 -doCounts 1 -maxDepth 99999 -minQ 20 -minMapQ 30 -minIndDepth 5 -  
653 setMinDepthInd 5 -minInd X1 -setMinDepth X2 -setMaxDepthInd X3 -setMaxDepth X4”. X1, X2, X3,  
654 and X4 are listed below. The consensus sequences of the mouse populations were used to calculate the  
655 Jukes-Cantor distances for 10,000 random non-overlapping 25 kbp windows from the autosomes with  
656 APE (5.1, “dist.dna” function) (Paradis, Claude, & Strimmer, 2004). The average distances obtained in  
657 this way are provided in Figure 2 - figure supplement 2. The expected distances for the three genes in  
658 Table 2 were calculated by multiplying the length of the gap-free alignment with the average distances.  
659 The observed values were retrieved from the distance table of the alignments using Geneious (11.1.2).  
660

| Population                             | Mean coverage | Standard deviation of coverage | X1 | X2 | X3  | X4  |
|----------------------------------------|---------------|--------------------------------|----|----|-----|-----|
| <i>A. uralensis</i>                    | 17.912        | 23.999                         | 1  | 5  | 90  | 90  |
| <i>M. mattheyi</i>                     | 23.304        | 83.028                         | 1  | 5  | 273 | 273 |
| <i>M. spicilegus</i>                   | 25.138        | 24.627                         | 1  | 5  | 100 | 100 |
| <i>M. spretus</i>                      | 24.885        | 14.216                         | 4  | 20 | 68  | 54  |
| <i>M. m. castaneus</i>                 | 14.015        | 7.573                          | 5  | 25 | 37  | 370 |
| <i>M. m. musculus</i> from Afghanistan | 17.768        | 58.551                         | 3  | 15 | 59  | 354 |

|                                           |        |        |   |    |    |     |
|-------------------------------------------|--------|--------|---|----|----|-----|
| <i>M. m. musculus</i> from Kazakhstan     | 25.123 | 15.975 | 4 | 20 | 74 | 592 |
| <i>M. m. musculus</i> from Czech Republic | 24.338 | 14.103 | 4 | 20 | 67 | 536 |
| <i>M. m. domesticus</i> from Iran         | 20.249 | 9.820  | 4 | 20 | 50 | 400 |
| <i>M. m. domesticus</i> from Germany      | 21.639 | 10.518 | 4 | 20 | 54 | 432 |
| <i>M. m. domesticus</i> from France       | 21.499 | 10.027 | 4 | 20 | 52 | 416 |

661

662 *Mouse knockout lines*

663 The line with allele *A930004D18Rik*<sup>*tm1a(EUCOMM)Wtsi*</sup> (genetic background: C57BL/6N) was obtained from  
664 the European Mouse Mutant Archive (EMMA). We converted it to the *Udng1* knockout line (*tm1b*) using  
665 a cell-permeable Cre recombinase in order to delete the coding exon together with the selection cassette  
666 according to the method described in (Ryder et al., 2014). In brief, the females from the line were super-  
667 ovulated and were then mated with the males from the line. The 2-cell embryos were collected and treated  
668 with HTN-Cre from Excellgen (Catalog no. RP-7). Then they were transferred into 0.5-day pseudo-  
669 pregnant females. The alleles of the pups were confirmed by PCR and Sanger sequencing, and only the  
670 mice with black coat color were used for further breeding and experiments.

671 The knockout line for *Udng2* with allele *A830005F24Rik*<sup>*tm1.1(KOMP)Mbp*</sup> (genetic background: C57BL/6N)  
672 was obtained from the Knock-Out Mouse Project (KOMP).

673 *Udng3* was also originally targeted by KOMP, but the line was lost. Hence, we obtained a custom-made  
674 CRISPR/Cas9 line from the Mouse Biology Program (MBP). The guide RNA was designed to target the  
675 beginning of the ORF in the second coding exon and away from the splicing site (genomic DNA target: 5'  
676 TGCTCCATCTGCTTTTCAGG 3'). We obtained three mosaic frameshift knockout mice (genetic  
677 background: C57BL/6N). Then we mated them with the wildtypes from the same litters to have  
678 heterozygous pups, and selected one female and one male with a heterozygous 7-bp deletion as the  
679 founding pair for further breeding and experiments.

680 Primers for genotyping the three lines are listed below.

681

682



| Line         | Allele<br>(Fragment length) | Direction | Sequence (5' > 3')              |
|--------------|-----------------------------|-----------|---------------------------------|
| <i>Udng1</i> | KO<br>(380 bp)              | Forward   | CGGTCGCTACCATTACCAGT            |
|              |                             | Reverse   | ACTGATGGCGAGCTCAGACC            |
|              | WT<br>(323 bp)              | Forward   | AGAGCAAACGTGCTGGAGTG            |
|              |                             | Reverse   | GCTTGGGCGATTGTGTCTC             |
| <i>Udng2</i> | KO<br>(618 bp)              | Forward   | GCTACCATTACCAGTTGGTCTGGTGTC     |
|              |                             | Reverse   | CAAGTGCTCTTAACACTCGGTAGCC       |
|              | WT<br>(331 bp)              | Forward   | CCTGGAAATGGTTTCATCTTGATAGG      |
|              |                             | Reverse   | Same as <i>Udng2</i> KO Reverse |
| <i>Udng3</i> | KO<br>(502 bp)              | Forward   | CCTACCACATTGGGGCCATC            |
|              |                             | Reverse   | TACAAGCCATAAAACCTCCTGGAT        |
|              | WT<br>(353 bp)              | Forward   | TTTTCTGCTCCATCTGCTTTTCA         |
|              |                             | Reverse   | AGTCACAGAGAAGGGGACGA            |

683

684 *Power analysis for RNA-Seq*

685 RnaSeqSampleSize (1.6.0) (Zhao, Li, Guo, Sheng, & Shyr, 2018) was used for power analysis.

686 Specifically, we used the `est_power` function, and set parameters `w` (ratio of normalization factors

687 between two groups) as 1, `alpha` (significance level) as  $3.3 \times 10^{-6}$ . Then we traversed all 98,670 possible

688 combinations of `N` (sample size) from 3 to 13, `rho` (fold change) from 1.05 to 1.5, `lambda0` (read count)

689 from 4 to 65,536, and `phi0` (dispersion) from 0.00025 to 1.024 to calculate the power values.

690 To calculate the power of each gene in each of our real RNA-Seq datasets, we also used the `est_power`

691 function with the parameters `w` as 1, `alpha` as  $3.3 \times 10^{-6}$ , and `n` as the real sample size, and `rho`

692 ( $2^{|\log_2 \text{FoldChange}|}$ ), `lambda0` (`baseMean`), and `phi0` (dispersion) estimated by DESeq2 (1.14.1) (Love, Huber,

693 & Anders, 2014) based on the real data.

694

695 *lacZ overexpression*

696 Primary mouse embryonic fibroblasts (MEFs) used for overexpression were obtained from C57BL/6 mice.

697 Specifically, we dissected 13.5-14.5 dpc embryos from uteruses and extraembryonic membranes into PBS

698 (Lonza, Catalog no. BE17-512F); discarded heads and soft tissues and washed the carcasses with PBS;

699 cut the carcasses into 2-3 mm pieces; transferred them into 50 ml Falcon tubes and added 5-20 ml

700 Trypsin-EDTA (Gibco, Catalog no. 25300-054); vortexed and incubated for 10 minutes at 37°C; vortexed  
701 again and incubated for 10 minutes at 37°C; inactivated trypsin by adding 2 volumes of medium (500 ml  
702 DMEM (Lonza, Catalog no. BE12-733F), 55 ml FBS (PAN, Catalog no. P30-3702), 5.5 ml glutamine  
703 (Lonza, Catalog no. BE17-605E), 5.5 ml penicillin (5,000 U/ml) / streptomycin (5,000 µg/ml) (Lonza,  
704 Catalog no. DE17-603)); pipetted up and down to get single cell suspension; plated cells and incubated  
705 overnight.

706 We separately cloned the fragment of the *lacZ* ORF from the *Udng2* knockout allele (*Udng1* and *Udng2*  
707 knockout alleles have the identical *lacZ* ORF) and its reverse complement fragment into pVITRO2-neo-  
708 GFP/LacZ expression vector (Catalog no. pvitro2-ngfplacz) to replace its own *lacZ* ORF using  
709 homologous recombination method, and then purified the plasmids with QIAGEN EndoFree Plasmid  
710 Maxi Kit (Catalog no. 12362). The replacements in the vectors were confirmed by PCR and Sanger  
711 sequencing. Ten independent transfections for each of the two plasmids into the P2 MEFs were performed  
712 separately with Amaxa Mouse/Rat Hepatocyte Nucleofector™ Kit (Catalog no. VPL-1004) according to  
713 manufacturer's recommendation. Transfected cells were grown in the medium (see above). Cells were  
714 incubated at 37°C in 5% CO<sub>2</sub> atmosphere as a pH regulator. The expression of *lacZ* in *lacZ* overexpressed  
715 cells but not in reverse *lacZ* overexpressed cells was confirmed using a β-Galactosidase Staining Kit  
716 (Catalog no. K802-250). Total RNAs from the transfected cells were purified using QIAGEN RNeasy  
717 Mini Kit (Catalog no. 74106) 48 hours after transfection.

718

#### 719 *RNA-Seq and data analysis*

720 The heads of postnatal 0.5-day *Udng1* and *Udng2* pups, the 12.5-day *Udng1* embryos, and the oviducts of  
721 10-11 weeks old *Udng3* females were carefully collected and immediately frozen with liquid nitrogen.  
722 Then, for all these samples, total RNAs were purified using QIAGEN RNeasy Microarray Tissue Mini  
723 Kit (Catalog no. 73304). All RNA samples, including the total RNAs purified from the transfected MEF  
724 cells, were prepared using Illumina TruSeq Stranded mRNA HT Library Prep Kit (Catalog no. RS-122-

725 2103), and sequenced using Illumina NextSeq 500 and NextSeq 500/550 High Output v2 Kit (150 cycles)  
726 (Catalog no. FC-404-2002). All procedures were performed in standardized and parallel way.  
727 Raw sequencing outputs were converted to FASTQ files with bcl2fastq (2.17.1.14), and reads were  
728 trimmed with Trimmomatic (0.35) (Bolger et al., 2014). Only paired-end reads left were used for  
729 following analyses. We mapped the trimmed reads to mouse genome GRCm38 (Mouse Genome  
730 Sequencing et al., 2002; Zerbino et al., 2018) with HISAT2 (2.0.4) (Kim et al., 2015) and SAMtools  
731 (1.3.1) (H. Li & Durbin, 2009), and took advantage of the mouse gene annotation in Ensembl (Version 86)  
732 by using the --ss and --exon options of hisat2-build. We counted fragments mapped to the genes  
733 annotated by Ensembl (Version 86) with HTSeq (0.6.1p1) (Anders, Pyl, & Huber, 2015), and performed  
734 differential expression analysis with DESeq2 (1.14.1) (Love et al., 2014). Besides the DESeq2 default  
735 outputs, we also added the dispersions estimated by DESeq2 (1.14.1) and the powers calculated by  
736 RnaSeqSampleSize (1.6.0) (Zhao et al., 2018) (see *Power analysis for RNA-Seq*) into the outputs.  
737 KOBAS (2.0) (Xie et al., 2011) was used for functional enrichment analysis.  
738 For the RNA-Seq of the oviducts of *Udng3* females, principle component analysis and hierarchical  
739 clustering with Euclidean distance and complete agglomeration method on the variance stabilized  
740 transformed fragment counts were also performed using DESeq2 (1.14.1) to assign the 24 samples into  
741 three clusters.

742

#### 743 *Whole genome sequencing of the Udng3 founding pair and off-target analysis*

744 The genomic DNAs from the founding pair were purified with salt precipitation. Then the samples were  
745 prepared with Illumina TruSeq Nano DNA HT Library Prep Kit (Catalog no. FC-121-4003), and  
746 sequenced on HiSeq 2500 with TruSeq PE Cluster Kit v3-cBot-HS (Catalog no. PE-401-3001) and HiSeq  
747 Rapid SBS Kit v2 (500 cycles) (Catalog no. FC-402-4023). The reads were  $2 \times 250$  bp in order to have  
748 good power to detect indels.  
749 We followed GATK Best Practices (Van der Auwera et al., 2013) to call variants. Specifically, we  
750 mapped the reads to mouse genome GRCm38 (Mouse Genome Sequencing et al., 2002; Zerbino et al.,

751 2018) with BWA (0.7.15-r1140) (H. Li & Durbin, 2009), and marked duplicates with Picard (2.9.0)  
752 (<http://broadinstitute.github.io/picard>), and realigned around the indels founded in C57BL/6NJ line  
753 (Keane et al., 2011) with GATK (3.7), and recalibrated base quality scores with GATK (3.7) using  
754 variants founded in C57BL/6NJ line (Keane et al., 2011) to get analysis-ready reads. We assessed  
755 coverage with GATK (3.7) and SAMtools (1.3.1) (H. Li et al., 2009), and the coverage of female was  
756 35.48 X and the one of male was 35.09 X. High coverages also provided good power to detect indels. We  
757 called variants with GATK (3.7), and applied generic hard filters with GATK (3.7): "QD < 2.0 || FS >  
758 60.0 || MQ < 40.0 || MQRankSum < -12.5 || ReadPosRankSum < -8.0 || SOR > 3.0" for SNVs and "QD <  
759 2.0 || FS > 200.0 || ReadPosRankSum < -20.0 || SOR > 10.0" for indels. We found 80375 SNVs and 73387  
760 indels in the female and 81213 SNVs and 71857 indels in the male.

761 347 potential off-target sites were predicted on "<http://crispr.mit.edu:8079/>" based on mouse genome  
762 mm9. 343 of them still existed in mouse genome mm10 after converting by liftOver (26 Jan. 2015) (Kent  
763 et al., 2002), and the four missing sites were rank low anyway: 131, 132, 143, and 200. GATK (3.7) was  
764 used to look for variants found in the whole genome sequencing in the 100 bp regions around the 343  
765 sites. In addition, the reads mapped to the regions around the top 20 sites were manually checked in both  
766 samples.

767

#### 768 *Behavioral tests*

769 The following behavioral tests were performed on the *Udng1* and *Udng2* mice used in this study: elevated  
770 plus maze test, open field test and novel object test. All tests were recorded on video using a VK-13165  
771 Eneo camera mounted directly above the experimental set-up and behaviors were measured using  
772 VideoMot2 (TSE Systems). All tests were filmed in the same room under similar lighting conditions (less  
773 than 200 lux). All lights faced the ceiling in order to avoid any glare or reflections within the test arenas.  
774 For the elevated plus maze we used an arena that was designed for testing wild mice. It was constructed  
775 as two perpendicular arms using PVC plastic and acrylic glass, and was 80 cm above ground. The dark  
776 arms of the maze were made with grey PVC plastic sides, with a white PVC plastic bottom. The dark

777 arms were 50 cm long, 10 cm wide and 40 cm deep. Open arms had same dimensions, except that the  
778 walls were made of acrylic glass instead of grey plastic. For testing, each mouse was placed at the center  
779 of the arena at the beginning of the test using a transparent plastic transfer pipe. Mice were filmed inside  
780 the test arena for 5 minutes (Holmes, Parmigiani, Ferrari, Palanza, & Rodgers, 2000). VideoMot2 (TSE  
781 Systems) was used to measure the time which the mouse spent in the dark arm, the light arm, and the  
782 center of the maze. After each experiment, the test arena was cleaned with 30% ethanol.

783 The open field arena was made of white PVC plastic and measured 60 x 60 cm, and the walls were 60 cm  
784 high. The arena was placed directly beneath a security camera and measurements were taken using  
785 VideoMot2 (TSE Systems). At the beginning of the experiment, the mouse was placed at the center of the  
786 arena using a transparent plastic transfer pipe. Each mouse was filmed for 5 minutes. Measurements taken  
787 during the open field test included the amount of time spent at the wall of the arena (up to 8 cm away  
788 from the wall) and the distance travel during the experiment (Yuen, Pillay, Heinrichs, Schoepf, &  
789 Schradin, 2016). After each experiment, the test arena was cleaned with 30% ethanol.

790 The novel object test was carried out in the same arena as the open field test. The arena was placed  
791 directly beneath a security camera and measurements were taken using VideoMot2 (TSE Systems). At the  
792 beginning of the experiment, the mouse was placed at the center of the arena using a transparent plastic  
793 transfer pipe along with a toy made of colored building blocks (Lego). Each mouse was filmed for 5  
794 minutes. Measurements taken during the novel object test included the latency to investigate the novel  
795 object, the number of visits to the novel object, and the distance travel during the experiment. The number  
796 of visits to the novel object was accessed based on visits to an area of 7.5 cm around the novel object  
797 (Yuen et al., 2016). After each experiment, the test arena and novel object were cleaned with 30% ethanol.

798 All the measured *Udng1* and *Udng2* mice are adult males. They were genotyped in advance, matched  
799 between knockouts and wildtypes. The genotypes were then masked to the experimenter. Their ages were  
800 from 11 to 17 weeks old for *Udng1* and from 15 to 25 weeks old for *Udng2*. Each mouse stayed alone in  
801 the cage in a room with only male mice at least two weeks before measurements. 40 *Udng1* mice  
802 measured by elevated plus maze test, open field test, and novel object test were divided into two groups

803 (20 in Group A and 20 in Group B) and were measured in two different days for the same test. 36 *Udng2*  
804 mice measured by elevated plus maze test were divided into three groups (12 in Group A, 8 in Group B,  
805 and 16 in Group C) and were measured in three different days. For the open field test and novel object  
806 test, only the group A mice could be measured. The order of the mice to be measured in each group was  
807 randomly shuffled.

808 Nested ranks test (Thompson, Smouse, Scofield, & Sork, 2014) was used for the statistical analyses to  
809 compare the parameters in each behavioral tests between knockouts and wildtypes. It is a non-parametric  
810 linear mixed model test, and uses the genotype as the fixed effect and the group membership as the  
811 random effect. For the parameters of the behavioral tests having only one group, it is essentially identical  
812 to one-tailed Wilcoxon rank sum test.

813

#### 814 *Limb morphology*

815 Mouse limbs were scanned using a computer tomograph (micro-CT-vivaCT 40, Scanco, Bruettisellen,  
816 Switzerland; energy: 70 kVp, intensity: 114  $\mu$ A, voxelsize: 38  $\mu$ m). Further, three-dimensional cross-  
817 sections were generated with a resolution of one cross-section per 0.038 mm. Two 3D landmarks were  
818 located at the endpoints of each limb bone using the TINA landmarking tool (Schunke, Bromiley, Tautz,  
819 & Thacker, 2012), and the linear distance between the two landmarks were calculated for statistical  
820 analyses. Detailed description of landmarks for each bone was previously reported in (Skrabar et al.,  
821 2018). Measurements were obtained from the right side of three forelimb bones (humerus, ulna, and  
822 metacarpal bone) and three hindlimb bones (femur, tibia, and metatarsal bone).

823 40 *Udng1* adult males at an age between 13-19 weeks were measured. They were genotyped in advance,  
824 matched between knockouts and wildtypes and then the genotypes were masked to the experimenter. The  
825 order of the mice to be measured in each group was randomly shuffled.

826

827

828

829 *Fertility test*

830 *Udng3* mating pairs were set up for the fertility test. The female and male in each pair were 8-9 weeks old  
831 when the mating was started. All the males were wildtype, and 10 females were homozygous knockout  
832 and the other 10 were wildtype. The time (days) having the 1st or 2nd litters, the numbers of pups of the  
833 1st or 2nd litters, and whether the pups were eaten later for each mating pair were carefully observed and  
834 recorded by animal caretakers who were blind about the genotypes.

835

836 *Data availability*

837 The ENA BioProject accession number for the sequencing data reported in this study is PRJEB28348.

838

839 **Acknowledgments**

840 The authors are grateful to R. Neme for generating a first version of the candidate gene list; J. Ruiz-Orera  
841 for generating the bam files from Ribo-Seq datasets; C. Pfeifle, A. Vock, A. Jonas, C. Medina, and S.  
842 Holz for keeping the mice used in this project; S. von Merten, C. Pfeifle, H. Harre, and W. Rasmus for  
843 helping mouse phenotyping experiments; B. Kleinhenz for helping cell culture experiments; E. Blohm-  
844 Sievers for helping mouse genotyping and Sanger sequencing; C. Burghardt, E. McConnell, and H. Buhtz  
845 for helping Illumina sequencing. The mouse line with *Udng1* targeted allele used for this project was  
846 obtained from EMMA; the *Udng2* knockout mouse line used for this project was obtained from KOMP;  
847 and the *Udng3* knockout mouse line used for this project was obtained from MBP. This work was  
848 supported by a European Research Council advanced grant to DT (NewGenes - 322564).

849

850

851



## 852 References

- 853 Anders, S., Pyl, P. T., & Huber, W. (2015). HTSeq--a Python framework to work with high-throughput  
854 sequencing data. *Bioinformatics*, *31*(2), 166-169. doi:10.1093/bioinformatics/btu638
- 855 Bao, Z., Clancy, M. A., Carvalho, R. F., Elliott, K., & Folta, K. M. (2017). Identification of Novel Growth  
856 Regulators in Plant Populations Expressing Random Peptides. *Plant Physiol*, *175*(2), 619-627.  
857 doi:10.1104/pp.17.00577
- 858 Barrett, T., Wilhite, S. E., Ledoux, P., Evangelista, C., Kim, I. F., Tomashevsky, M., . . . Soboleva, A. (2013).  
859 NCBI GEO: archive for functional genomics data sets--update. *Nucleic Acids Res*, *41*(Database  
860 issue), D991-995. doi:10.1093/nar/gks1193
- 861 Barton, N. H., Etheridge, A. M., & Veber, A. (2017). The infinitesimal model: Definition, derivation, and  
862 implications. *Theor Popul Biol*, *118*, 50-73. doi:10.1016/j.tpb.2017.06.001
- 863 Bekpen, C., Xie, C., & Tautz, D. (2018). Dealing with the adaptive immune system during de novo  
864 evolution of genes from intergenic sequences. *BMC Evol Biol*, *18*(1), 121. doi:10.1186/s12862-  
865 018-1232-z
- 866 Bolger, A. M., Lohse, M., & Usadel, B. (2014). Trimmomatic: a flexible trimmer for Illumina sequence  
867 data. *Bioinformatics*, *30*(15), 2114-2120. doi:10.1093/bioinformatics/btu170
- 868 Boyle, E. A., Li, Y. I., & Pritchard, J. K. (2017). An Expanded View of Complex Traits: From Polygenic to  
869 Omnigenic. *Cell*, *169*(7), 1177-1186. doi:10.1016/j.cell.2017.05.038
- 870 Cai, J., Zhao, R., Jiang, H., & Wang, W. (2008). De novo origination of a new protein-coding gene in  
871 *Saccharomyces cerevisiae*. *Genetics*, *179*(1), 487-496. doi:10.1534/genetics.107.084491
- 872 Calviello, L., Mukherjee, N., Wyler, E., Zauber, H., Hirsekorn, A., Selbach, M., . . . Ohler, U. (2016).  
873 Detecting actively translated open reading frames in ribosome profiling data. *Nat Methods*,  
874 *13*(2), 165-170. doi:10.1038/nmeth.3688
- 875 Castaneda, J., Genzor, P., van der Heijden, G. W., Sarkeshik, A., Yates, J. R., 3rd, Ingolia, N. T., & Bortvin,  
876 A. (2014). Reduced pachytene piRNAs and translation underlie spermiogenic arrest in  
877 Maelstrom mutant mice. *EMBO J*, *33*(18), 1999-2019. doi:10.15252/embj.201386855
- 878 Chen, S., Krinsky, B. H., & Long, M. (2013). New genes as drivers of phenotypic evolution. *Nat Rev Genet*,  
879 *14*(9), 645-660. doi:10.1038/nrg3521
- 880 Chen, S., Zhang, Y. E., & Long, M. (2010). New genes in *Drosophila* quickly become essential. *Science*,  
881 *330*(6011), 1682-1685. doi:10.1126/science.1196380
- 882 Cho, J., Yu, N. K., Choi, J. H., Sim, S. E., Kang, S. J., Kwak, C., . . . Kaang, B. K. (2015). Multiple repressive  
883 mechanisms in the hippocampus during memory formation. *Science*, *350*(6256), 82-87.  
884 doi:10.1126/science.aac7368
- 885 Consortium, E. P. (2012). An integrated encyclopedia of DNA elements in the human genome. *Nature*,  
886 *489*(7414), 57-74. doi:10.1038/nature11247
- 887 Consortium, E. P., Birney, E., Stamatoyannopoulos, J. A., Dutta, A., Guigo, R., Gingeras, T. R., . . . de Jong,  
888 P. J. (2007). Identification and analysis of functional elements in 1% of the human genome by  
889 the ENCODE pilot project. *Nature*, *447*(7146), 799-816. doi:10.1038/nature05874
- 890 Cruz, A. P., Frei, F., & Graeff, F. G. (1994). Ethopharmacological analysis of rat behavior on the elevated  
891 plus-maze. *Pharmacol Biochem Behav*, *49*(1), 171-176.
- 892 DeJager, L., Libert, C., & Montagutelli, X. (2009). Thirty years of *Mus spretus*: a promising future. *Trends*  
893 *in Genetics*, *25*(5), 234-241. doi:10.1016/j.tig.2009.03.007
- 894 Desiere, F., Deutsch, E. W., King, N. L., Nesvizhskii, A. I., Mallick, P., Eng, J., . . . Aebersold, R. (2006). The  
895 PeptideAtlas project. *Nucleic Acids Res*, *34*(Database issue), D655-658. doi:10.1093/nar/gkj040
- 896 Diaz-Munoz, M. D., Bell, S. E., Fairfax, K., Monzon-Casanova, E., Cunningham, A. F., Gonzalez-Porta,  
897 M., . . . Turner, M. (2015). The RNA-binding protein HuR is essential for the B cell antibody  
898 response. *Nat Immunol*, *16*(4), 415-425. doi:10.1038/ni.3115



- 899 Djiane, A., Krejci, A., Bernard, F., Fexova, S., Millen, K., & Bray, S. J. (2013). Dissecting the mechanisms of  
900 Notch induced hyperplasia. *EMBO J*, *32*(1), 60-71. doi:10.1038/emboj.2012.326
- 901 Domazet-Lošo, T., Carvunis, A. R., Alba, M. M., Sestak, M. S., Bakaric, R., Neme, R., & Tautz, D. (2017). No  
902 Evidence for Phylostratigraphic Bias Impacting Inferences on Patterns of Gene Emergence and  
903 Evolution. *Molecular Biology and Evolution*, *34*(4), 843-856. doi:10.1093/molbev/msw284
- 904 Dosztanyi, Z., Csizmok, V., Tompa, P., & Simon, I. (2005). The pairwise energy content estimated from  
905 amino acid composition discriminates between folded and intrinsically unstructured proteins. *J*  
906 *Mol Biol*, *347*(4), 827-839. doi:10.1016/j.jmb.2005.01.071
- 907 Faure, G., & Callebaut, I. (2013). Comprehensive repertoire of foldable regions within whole genomes.  
908 *PLoS Comput Biol*, *9*(10), e1003280. doi:10.1371/journal.pcbi.1003280
- 909 Fernandes, C., & File, S. E. (1996). The influence of open arm ledges and maze experience in the elevated  
910 plus-maze. *Pharmacol Biochem Behav*, *54*(1), 31-40.
- 911 Gonzalez, C., Sims, J. S., Hornstein, N., Mela, A., Garcia, F., Lei, L., . . . Sims, P. A. (2014). Ribosome  
912 profiling reveals a cell-type-specific translational landscape in brain tumors. *J Neurosci*, *34*(33),  
913 10924-10936. doi:10.1523/JNEUROSCI.0084-14.2014
- 914 Guo, H., Ingolia, N. T., Weissman, J. S., & Bartel, D. P. (2010). Mammalian microRNAs predominantly act  
915 to decrease target mRNA levels. *Nature*, *466*(7308), 835-840. doi:10.1038/nature09267
- 916 Harr, B., Karakoc, E., Neme, R., Teschke, M., Pfeifle, C., Pezer, Z., . . . Tautz, D. (2016). Genomic resources  
917 for wild populations of the house mouse, *Mus musculus* and its close relative *Mus spretus*. *Sci*  
918 *Data*, *3*, 160075. doi:10.1038/sdata.2016.75
- 919 Heinen, T. J., Staubach, F., Haming, D., & Tautz, D. (2009). Emergence of a new gene from an intergenic  
920 region. *Curr Biol*, *19*(18), 1527-1531. doi:10.1016/j.cub.2009.07.049
- 921 Herde, A., & Eccard, J. A. (2013). Consistency in boldness, activity and exploration at different stages of  
922 life. *BMC Ecol*, *13*, 49. doi:10.1186/1472-6785-13-49
- 923 Holmes, A., Parmigiani, S., Ferrari, P. F., Palanza, P., & Rodgers, R. J. (2000). Behavioral profile of wild  
924 mice in the elevated plus-maze test for anxiety. *Physiol Behav*, *71*(5), 509-516.
- 925 Kaessmann, H. (2010). Origins, evolution, and phenotypic impact of new genes. *Genome Res*, *20*(10),  
926 1313-1326. doi:gr.101386.109 [pii]
- 927 Keane, T. M., Goodstadt, L., Danecek, P., White, M. A., Wong, K., Yalcin, B., . . . Adams, D. J. (2011).  
928 Mouse genomic variation and its effect on phenotypes and gene regulation. *Nature*, *477*(7364),  
929 289-294. doi:10.1038/nature10413
- 930 Kent, W. J., Sugnet, C. W., Furey, T. S., Roskin, K. M., Pringle, T. H., Zahler, A. M., & Haussler, D. (2002).  
931 The human genome browser at UCSC. *Genome Res*, *12*(6), 996-1006. doi:10.1101/gr.229102
- 932 Kim, D., Langmead, B., & Salzberg, S. L. (2015). HISAT: a fast spliced aligner with low memory  
933 requirements. *Nat Methods*, *12*(4), 357-360. doi:10.1038/nmeth.3317
- 934 Kim, D., Pertea, G., Trapnell, C., Pimentel, H., Kelley, R., & Salzberg, S. L. (2013). TopHat2: accurate  
935 alignment of transcriptomes in the presence of insertions, deletions and gene fusions. *Genome*  
936 *Biol*, *14*(4), R36. doi:10.1186/gb-2013-14-4-r36
- 937 Knopp, M., & Andersson, D. I. (2018). No beneficial fitness effects of random peptides. *Nat Ecol Evol*,  
938 *2*(7), 1046-1047. doi:10.1038/s41559-018-0585-4
- 939 Korneliussen, T. S., Albrechtsen, A., & Nielsen, R. (2014). ANGSD: Analysis of Next Generation  
940 Sequencing Data. *BMC Bioinformatics*, *15*, 356. doi:10.1186/s12859-014-0356-4
- 941 Langmead, B., & Salzberg, S. L. (2012). Fast gapped-read alignment with Bowtie 2. *Nat Methods*, *9*(4),  
942 357-359. doi:10.1038/nmeth.1923
- 943 Lee, K. F., Xu, J. S., Lee, Y. L., & Yeung, W. S. (2006). Demilune cell and parotid protein from murine  
944 oviductal epithelium stimulates preimplantation embryo development. *Endocrinology*, *147*(1),  
945 79-87. doi:10.1210/en.2005-0596

- 946 Li, D., Dong, Y., Jiang, Y., Jiang, H., Cai, J., & Wang, W. (2010). A de novo originated gene depresses  
947 budding yeast mating pathway and is repressed by the protein encoded by its antisense strand.  
948 *Cell Res*, 20(4), 408-420. doi:10.1038/cr.2010.31
- 949 Li, D., Yan, Z., Lu, L., Jiang, H., & Wang, W. (2014). Pleiotropy of the de novo-originated gene MDF1. *Sci*  
950 *Rep*, 4, 7280. doi:10.1038/srep07280
- 951 Li, H., & Durbin, R. (2009). Fast and accurate short read alignment with Burrows-Wheeler transform.  
952 *Bioinformatics*, 25(14), 1754-1760. doi:10.1093/bioinformatics/btp324
- 953 Li, H., Handsaker, B., Wysoker, A., Fennell, T., Ruan, J., Homer, N., . . . Durbin, R. (2009). The Sequence  
954 Alignment/Map format and SAMtools. *Bioinformatics*, 25(16), 2078-2079.  
955 doi:10.1093/bioinformatics/btp352
- 956 Long, M., Vankuren, N. W., Chen, S., & Vibranovski, M. D. (2013). New gene evolution: little did we know.  
957 *Annu Rev Genet*, 47, 307-333. doi:10.1146/annurev-genet-111212-133301
- 958 Love, M. I., Huber, W., & Anders, S. (2014). Moderated estimation of fold change and dispersion for  
959 RNA-seq data with DESeq2. *Genome Biol*, 15(12), 550. doi:10.1186/s13059-014-0550-8
- 960 McLysaght, A., & Hurst, L. D. (2016). Open questions in the study of de novo genes: what, how and why.  
961 *Nat Rev Genet*, 17(9), 567-578. doi:10.1038/nrg.2016.78
- 962 Mouse Genome Sequencing, C., Waterston, R. H., Lindblad-Toh, K., Birney, E., Rogers, J., Abril, J. F., . . .  
963 Lander, E. S. (2002). Initial sequencing and comparative analysis of the mouse genome. *Nature*,  
964 420(6915), 520-562. doi:10.1038/nature01262
- 965 Moyers, B. A., & Zhang, J. (2015). Phylostratigraphic Bias Creates Spurious Patterns of Genome Evolution.  
966 *Molecular Biology and Evolution*, 32(1), 258-267. doi:10.1093/molbev/msu286
- 967 Mudge, J. M., & Harrow, J. (2015). Creating reference gene annotation for the mouse C57BL6/J genome  
968 assembly. *Mamm Genome*, 26(9-10), 366-378. doi:10.1007/s00335-015-9583-x
- 969 Neme, R., Amador, C., Yildirim, B., McConnell, E., & Tautz, D. (2017). Random sequences are an  
970 abundant source of bioactive RNAs or peptides. *Nat Ecol Evol*, 1(6), 0217. doi:10.1038/s41559-  
971 017-0127
- 972 Neme, R., & Tautz, D. (2013). Phylogenetic patterns of emergence of new genes support a model of  
973 frequent de novo evolution. *BMC Genomics*, 14, 117. doi:10.1186/1471-2164-14-117
- 974 Neme, R., & Tautz, D. (2016). Fast turnover of genome transcription across evolutionary time exposes  
975 entire non-coding DNA to de novo gene emergence. *Elife*, 5, e09977. doi:10.7554/eLife.09977
- 976 O'Leary, N. A., Wright, M. W., Brister, J. R., Ciuffo, S., Haddad, D., McVeigh, R., . . . Pruitt, K. D. (2016).  
977 Reference sequence (RefSeq) database at NCBI: current status, taxonomic expansion, and  
978 functional annotation. *Nucleic Acids Res*, 44(D1), D733-745. doi:10.1093/nar/gkv1189
- 979 Paradis, E., Claude, J., & Strimmer, K. (2004). APE: Analyses of Phylogenetics and Evolution in R language.  
980 *Bioinformatics*, 20(2), 289-290.
- 981 Perteza, M., Perteza, G. M., Antonescu, C. M., Chang, T. C., Mendell, J. T., & Salzberg, S. L. (2015). StringTie  
982 enables improved reconstruction of a transcriptome from RNA-seq reads. *Nat Biotechnol*, 33(3),  
983 290-295. doi:10.1038/nbt.3122
- 984 Pezer, Z., Harr, B., Teschke, M., Babiker, H., & Tautz, D. (2015). Divergence patterns of genic copy  
985 number variation in natural populations of the house mouse (*Mus musculus domesticus*) reveal  
986 three conserved genes with major population-specific expansions. *Genome Res*, 25(8), 1114-  
987 1124. doi:10.1101/gr.187187.114
- 988 Reinhardt, J. A., Wanjiru, B. M., Brant, A. T., Saelao, P., Begun, D. J., & Jones, C. D. (2013). De novo ORFs  
989 in *Drosophila* are important to organismal fitness and evolved rapidly from previously non-  
990 coding sequences. *PLoS Genet*, 9(10), e1003860. doi:10.1371/journal.pgen.1003860
- 991 Rice, P., Longden, I., & Bleasby, A. (2000). EMBOSS: the European Molecular Biology Open Software  
992 Suite. *Trends Genet*, 16(6), 276-277.

- 993 Rodgers, R. J., & Johnson, N. J. (1995). Factor analysis of spatiotemporal and ethological measures in the  
994 murine elevated plus-maze test of anxiety. *Pharmacol Biochem Behav*, 52(2), 297-303.
- 995 Ruiz-Orera, J., Messeguer, X., Subirana, J. A., & Alba, M. M. (2014). Long non-coding RNAs as a source of  
996 new peptides. *Elife*, 3. doi:10.7554/eLife.03523
- 997 Ruiz-Orera, J., Verdaguer-Grau, P., Villanueva-Canas, J. L., Messeguer, X., & Alba, M. M. (2018).  
998 Translation of neutrally evolving peptides provides a basis for de novo gene evolution. *Nature*  
999 *Ecology & Evolution*, 2(5), 890-896. doi:10.1038/s41559-018-0506-6
- 1000 Ryder, E., Doe, B., Gleeson, D., Houghton, R., Dalvi, P., Grau, E., . . . Ramirez-Solis, R. (2014). Rapid  
1001 conversion of EUCOMM/KOMP-CSD alleles in mouse embryos using a cell-permeable Cre  
1002 recombinase. *Transgenic Res*, 23(1), 177-185. doi:10.1007/s11248-013-9764-x
- 1003 Schloetterer, C. (2015). Genes from scratch - the evolutionary fate of de novo genes. *Trends in Genetics*,  
1004 31(4), 215-219. doi:10.1016/j.tig.2015.02.007
- 1005 Schmitz, J. F., Ullrich, K. K., & Bornberg-Bauer, E. (2018). Incipient de novo genes can evolve from frozen  
1006 accidents that escaped rapid transcript turnover. *Nat Ecol Evol*, 2(10), 1626-1632.  
1007 doi:10.1038/s41559-018-0639-7
- 1008 Schunke, A. C., Bromiley, P. A., Tautz, D., & Thacker, N. A. (2012). TINA manual landmarking tool:  
1009 software for the precise digitization of 3D landmarks. *Front Zool*, 9(1), 6. doi:10.1186/1742-  
1010 9994-9-6
- 1011 Skrabar, N., Turner, L. M., Pallares, L. F., Harr, B., & Tautz, D. (2018). Using the *Mus musculus* hybrid  
1012 zone to assess covariation and genetic architecture of limb bone lengths. *Mol Ecol Resour*, 18(4),  
1013 908-921. doi:10.1111/1755-0998.12776
- 1014 Sloan, C. A., Chan, E. T., Davidson, J. M., Malladi, V. S., Strattan, J. S., Hitz, B. C., . . . Cherry, J. M. (2016).  
1015 ENCODE data at the ENCODE portal. *Nucleic Acids Res*, 44(D1), D726-732.  
1016 doi:10.1093/nar/gkv1160
- 1017 Tautz, D. (2014). The discovery of de novo gene evolution. *Perspect Biol Med*, 57(1), 149-161.  
1018 doi:10.1353/pbm.2014.0006
- 1019 Tautz, D., & Domazet-Lošo, T. (2011). The evolutionary origin of orphan genes. *Nat Rev Genet*, 12(10),  
1020 692-702. doi:10.1038/nrg3053
- 1021 Tautz, D., & Neme, R. (2018). Reply to 'No beneficial fitness effects of random peptides'. *Nature Ecology*  
1022 *& Evolution*, 2(7), 1048-1048. doi:10.1038/s41559-018-0586-3
- 1023 Thompson, P. G., Smouse, P. E., Scofield, D. G., & Sork, V. L. (2014). What seeds tell us about birds: a  
1024 multi-year analysis of acorn woodpecker foraging movements. *Movement Ecology*, 2(1), 12.  
1025 doi:10.1186/2051-3933-2-12
- 1026 Turelli, M. (2017). Commentary: Fisher's infinitesimal model: A story for the ages. *Theor Popul Biol*, 118,  
1027 46-49. doi:10.1016/j.tpb.2017.09.003
- 1028 Van der Auwera, G. A., Carneiro, M. O., Hartl, C., Poplin, R., Del Angel, G., Levy-Moonshine, A., . . .  
1029 DePristo, M. A. (2013). From FastQ data to high confidence variant calls: the Genome Analysis  
1030 Toolkit best practices pipeline. *Curr Protoc Bioinformatics*, 43, 11 10 11-33.  
1031 doi:10.1002/0471250953.bi1110s43
- 1032 Vizcaino, J. A., Csordas, A., del-Toro, N., Dianes, J. A., Griss, J., Lavidas, I., . . . Hermjakob, H. (2016). 2016  
1033 update of the PRIDE database and its related tools. *Nucleic Acids Res*, 44(D1), D447-456.  
1034 doi:10.1093/nar/gkv1145
- 1035 Walf, A. A., & Frye, C. A. (2007). The use of the elevated plus maze as an assay of anxiety-related  
1036 behavior in rodents. *Nat Protoc*, 2(2), 322-328. doi:10.1038/nprot.2007.44
- 1037 Xie, C., Mao, X., Huang, J., Ding, Y., Wu, J., Dong, S., . . . Wei, L. (2011). KOBAS 2.0: a web server for  
1038 annotation and identification of enriched pathways and diseases. *Nucleic Acids Res*, 39(Web  
1039 Server issue), W316-322. doi:gkr483 [pii]

- 1040 Xie, C., Zhang, Y. E., Chen, J. Y., Liu, C. J., Zhou, W. Z., Li, Y., . . . Li, C. Y. (2012). Hominoid-Specific De  
1041 Novo Protein-Coding Genes Originating from Long Non-Coding RNAs. *PLoS Genet*, *8*(9),  
1042 e1002942. doi:10.1371/journal.pgen.1002942
- 1043 Yang, H. N., Wang, J. R., Didion, J. P., Buus, R. J., Bell, T. A., Welsh, C. E., . . . de Villena, F. P. M. (2011).  
1044 Subspecific origin and haplotype diversity in the laboratory mouse. *Nature Genetics*, *43*(7), 648-  
1045 U173. doi:10.1038/ng.847
- 1046 Yuen, C. H., Pillay, N., Heinrichs, M., Schoepf, I., & Schradin, C. (2016). Personality traits are consistent  
1047 when measured in the field and in the laboratory in African striped mice (*Rhabdomys pumilio*).  
1048 *Behavioral Ecology and Sociobiology*, *70*(8), 1235-1246. doi:10.1007/s00265-016-2131-1
- 1049 Zerbino, D. R., Achuthan, P., Akanni, W., Amode, M. R., Barrell, D., Bhai, J., . . . Flicek, P. (2018). Ensembl  
1050 2018. *Nucleic Acids Res*, *46*(D1), D754-D761. doi:10.1093/nar/gkx1098
- 1051 Zhao, S., Li, C. I., Guo, Y., Sheng, Q., & Shyr, Y. (2018). RnaSeqSampleSize: real data based sample size  
1052 estimation for RNA sequencing. *BMC Bioinformatics*, *19*(1), 191. doi:10.1186/s12859-018-2191-  
1053 5
- 1054
- 1055

## Figure 2 - figure supplement 1

The alignments of *Udng1*, *Udng2* and *Udng3* ORF sequences from mouse species (*Mus* = *M.*), subspecies (*Mus musculus* = *M. m.*) and the outgroup *Apodemus*.

Three populations each are represented for *M. m. musculus* (KAZ = from Kazakhstan, AFG = from Afghanistan, CZE = from Czech Republic) and *M. m. domesticus* (IRA = from Iran, FRA = from France, GER = from Germany). All sequences are aligned to a consensus sequence that is produced as a consensus across all sequences shown. Identical positions are marked by a dot, replacements by the respective nucleotide (or IUPAC code, when polymorphic in the respective population), indels are marked by a dash. The translation frames refer to frame 1 that starts with ATG. Stop codons are marked by a star.



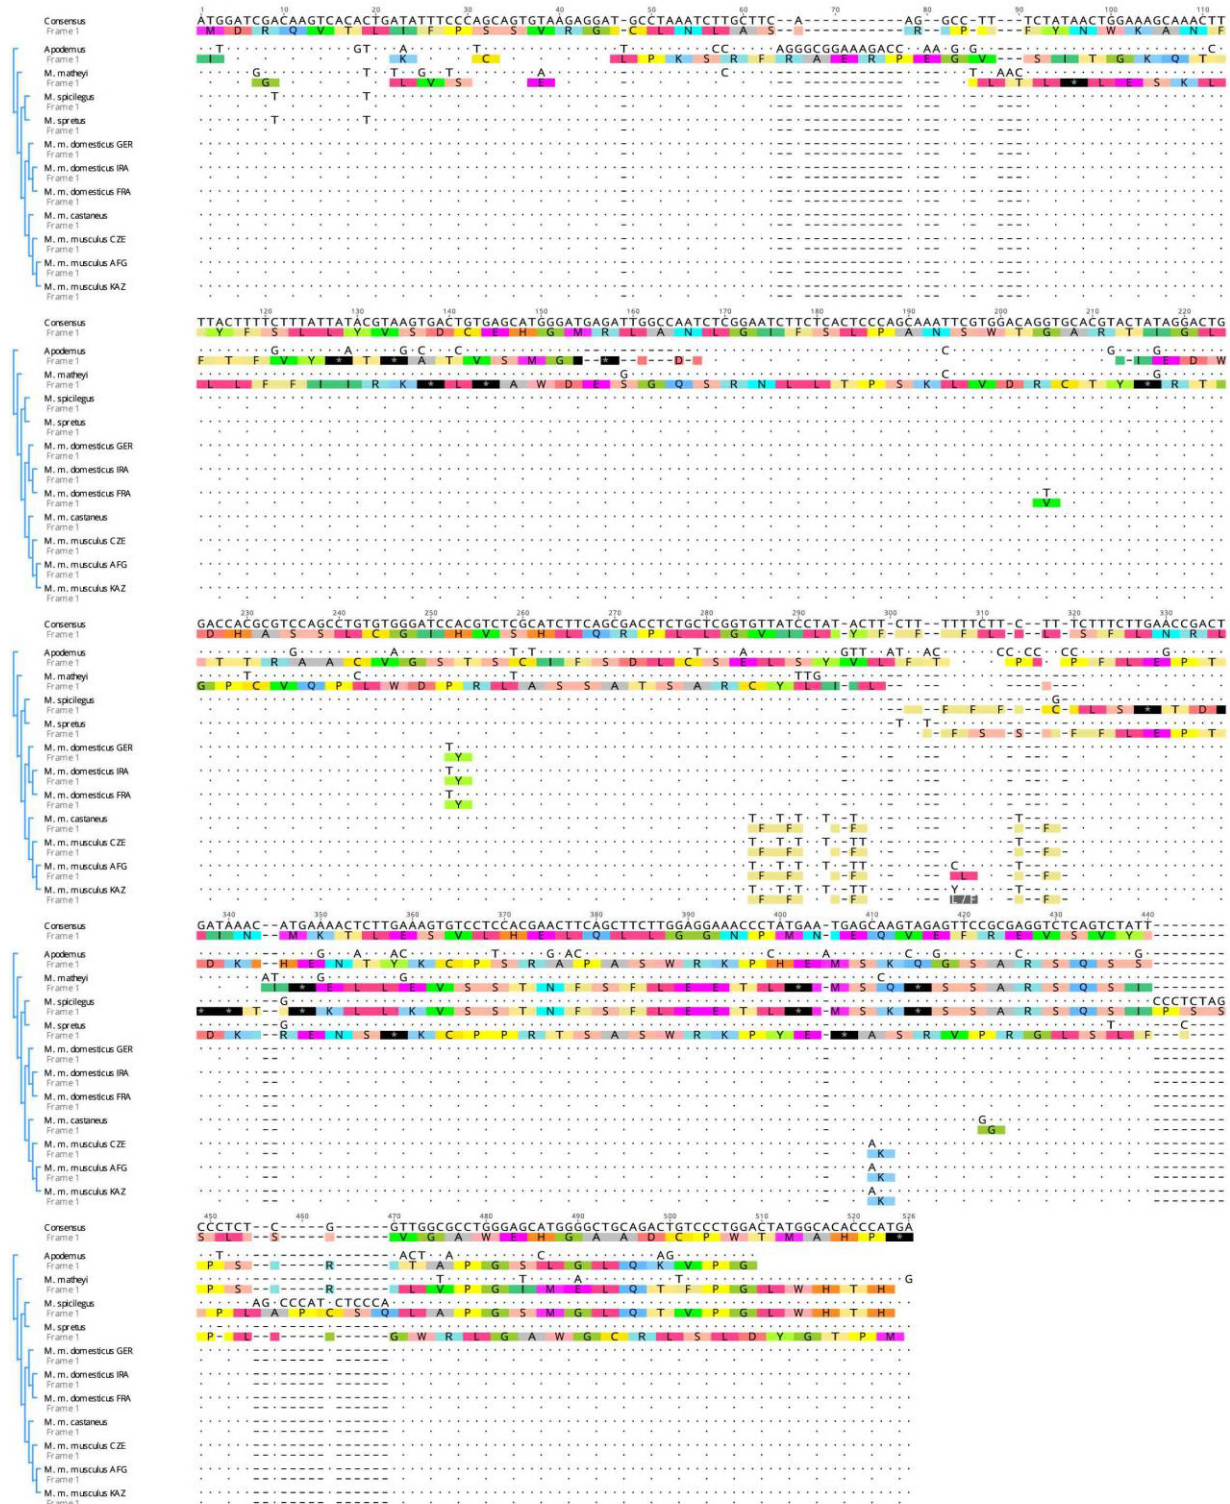

*Udg1*



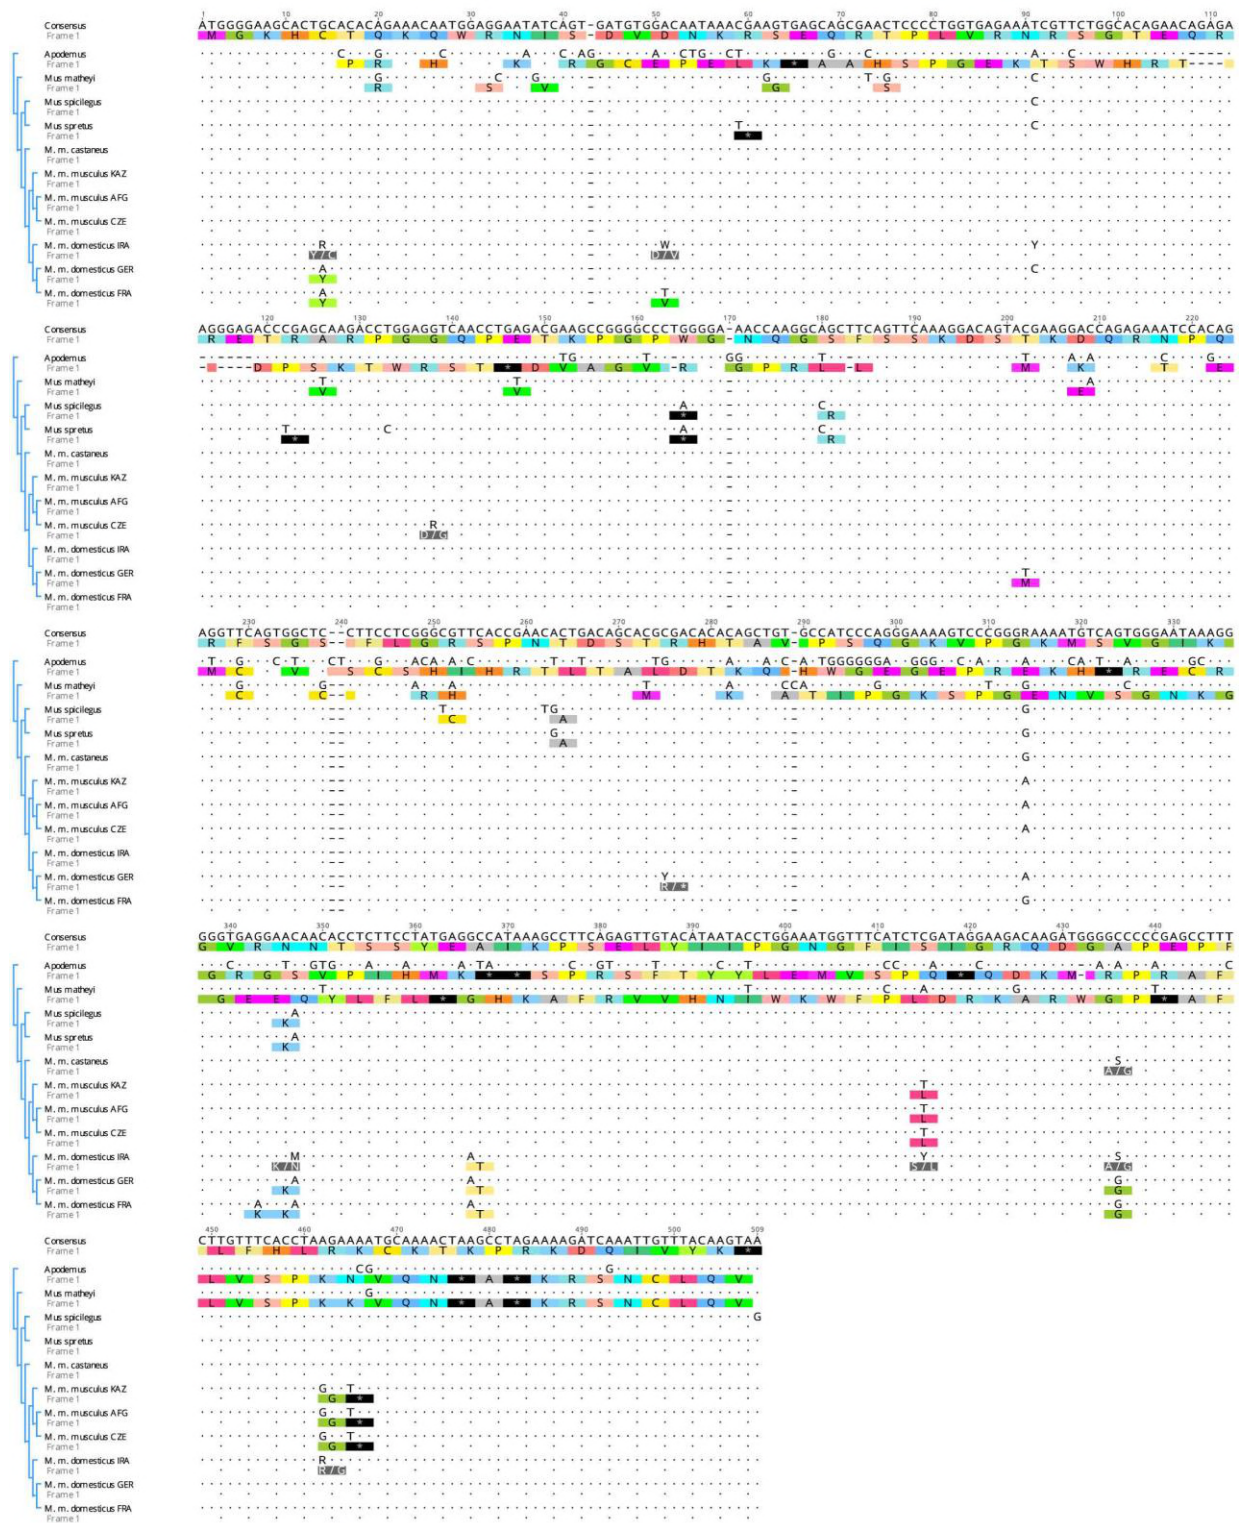

*Udng2*

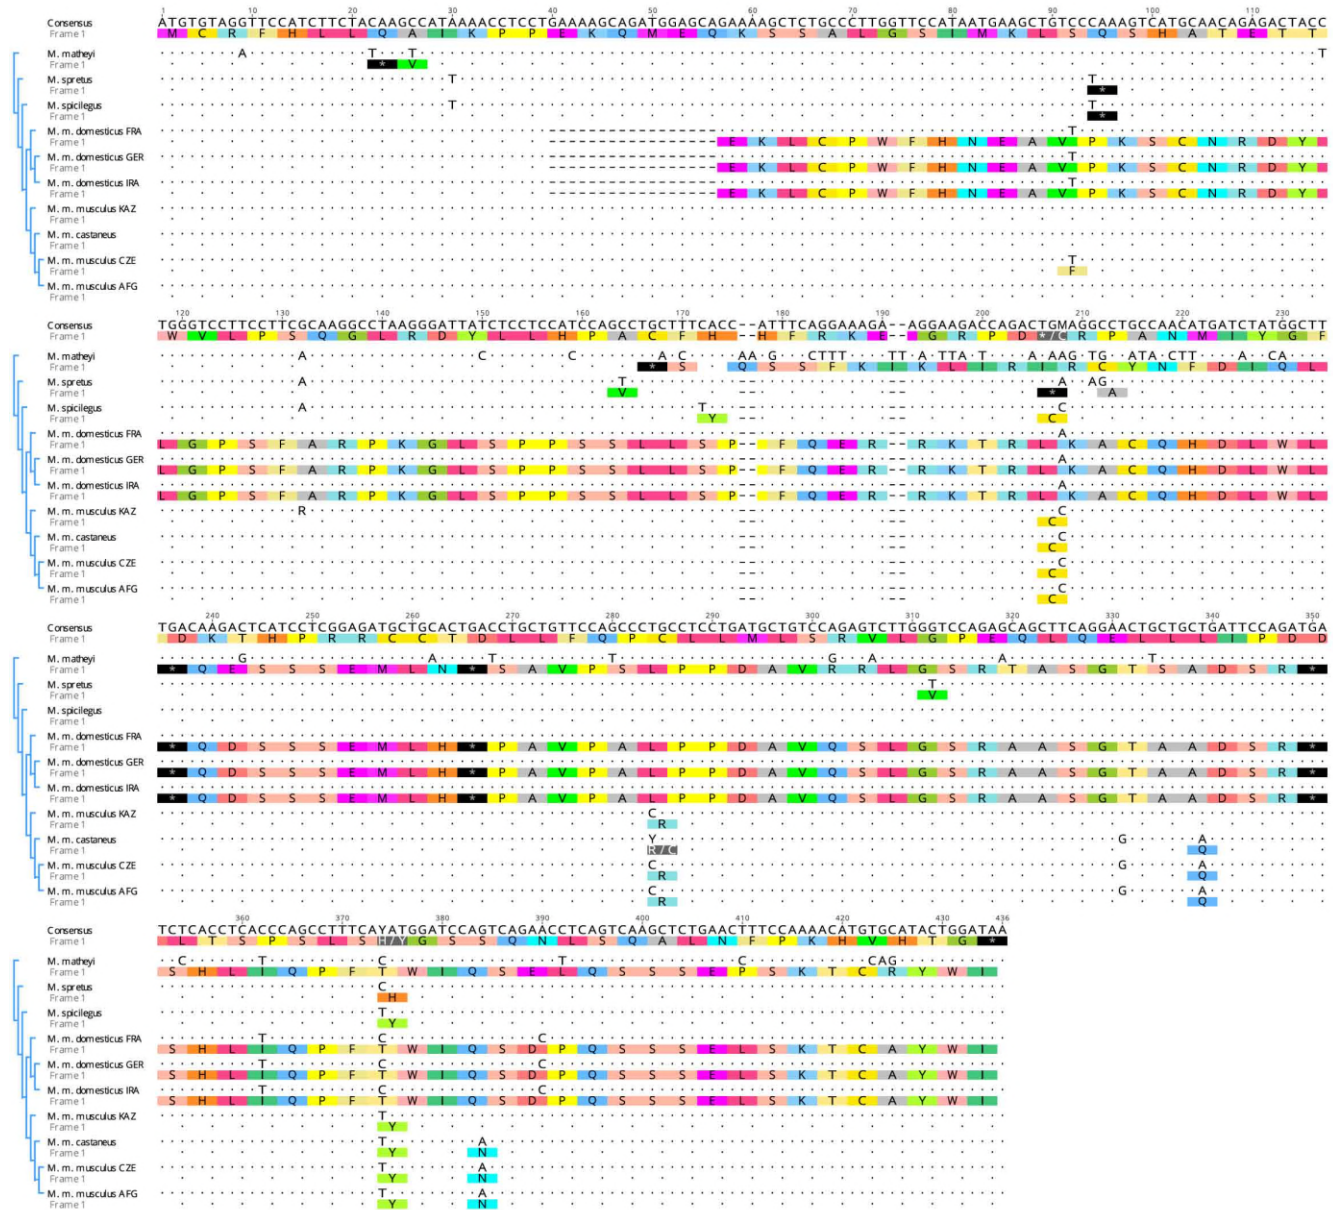

*Udn3*



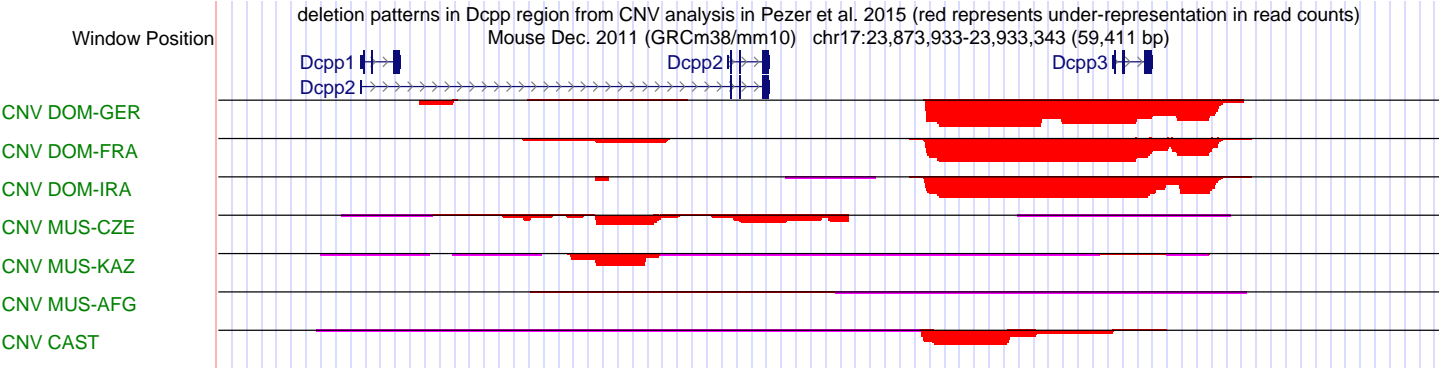

## Table 1 - supplement 1

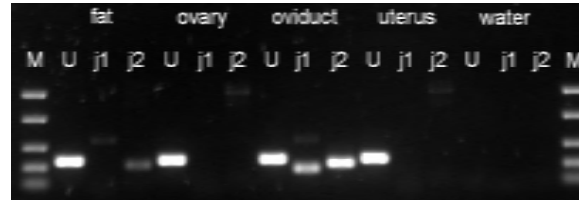

The ENCODE data do not provide the detail of expression in the different parts of the female reproductive system. Therefore, we have used RT-PCR across intron junctions to study *Udn3* expression in gonadal fat pad, ovary, oviduct, and uterus. Fat: gonadal fat pad; M: marker (from top to bottom: 1500 bp, 850 bp, 400 bp, 200 bp, 50 bp); U: *Uba1* (control gene, 255 bp); j1: *Udn3* junction 1 (161 bp); j2: *Udn3* junction 2 (209 bp).
